# Supplementary material for: A Zn-MOF functionalized with alkyne groups: ultrasensitive detection of Cu+ and Pd2+ ions in aqueous medium
Source: Royal Society of Chemistry journal article supplement (doi:10.1039/d3sd00188a), 2023-01-01
Supplement: d3sd00188a1.pdf [file d3sd00188a1.pdf]

## **Electronic Supplementary Information**

for the manuscript entitled

**A Zn-MOF functionalized with alkyne groups: Ultrasensitive detection of Cu<sup>+</sup> and Pd<sup>2+</sup> ions in aqueous medium**

Aashish, Ruchika Gupta, Rajeev Gupta\*

Department of Chemistry, University of Delhi, Delhi-110007

## Experimental Section

### Materials and methods

All chemicals and reagents were procured from the commercial companies and were used without further purification. The solvents were purified utilizing the standard literature methods.<sup>1</sup>

### Physical measurements

The FTIR spectra were recorded using an Agilent Cary – 630 spectrometer having a diamond ATR. NMR spectral measurements were done with a Jeol 400 MHz spectrometer. UV Visible spectra were recorded using a PerkinElmer Lambda-950 spectrophotometer. Fluorescence spectral studies were performed with a Cary Eclipse fluorescence spectrometer. Time-resolved fluorescence spectra were recorded using a picosecond fluorimeter from Horiba Jobin Yvon (FluoroHub). Photoluminescence studies were performed using a QM-8450-11 Quanta master up-conversion and down-conversion fluorescence spectrometer, equipped with a 450W Xe source lamp. Elemental analysis was carried out using an Elementar Analysen Systeme GmbH Vario EL-III instrument. Powder X-ray diffraction (PXRD) patterns were obtained either with a Rigaku Table-Top XRD or a Bruker AXS D8 Discover instrument (Cu  $K\alpha$  radiation,  $\lambda = 1.54184 \text{ \AA}$ ). The samples were ground and subjected to a range of  $\theta = 5\text{--}60^\circ$  at a slow scan rate at room temperature. Thermal gravimetric analysis (TGA) and differential scanning calorimetry (DSC) were performed with a Shimadzu DTG-60 and TA-DSC Q200 instruments, respectively, under a  $N_2$  atmosphere with a heating rate of  $10 \text{ }^\circ\text{C}$  per min. The nitrogen sorption isotherms were collected using a Quantachrome gas sorption analyzer. Barrett-Joyner-Halenda (BJH) model was used for the analysis of pore size based on  $N_2$  adsorption. SEM and EDX measurements were performed with a Jeol SM 6610 LV instrument.  $\zeta$  potentials were measured using a Malvern Zetasizer ZS90 instrument. For these studies, powdered samples were suspended in water followed by sonication to obtain a stable suspension. XPS studies were performed with a Kratos Analytical Axis Supra model.

### X-ray diffraction studies

Single crystal X-ray diffraction data for Zn-MOFs **1** and **2** were collected on a Rigaku Oxford XtaLAB Synergy-DW diffractometer or a Bruker SMART APEX-II CCD diffractometer equipped with a graphite monochromatic  $MoK\alpha$  radiation ( $\lambda = 0.71073 \text{ \AA}$ ).<sup>2</sup> For **1**, SMART<sup>3</sup> was used for collecting frames of data, indexing reflections and determining the lattice parameters; SAINT<sup>3</sup> for integration of the intensity of reflections and scaling; and SADABS<sup>4</sup>

for absorption correction. The frames were collected at 293(2) K. The structures were solved by the direct methods using SIR-97<sup>5</sup> and refined by the full-matrix least-squares refinement techniques on  $F^2$  using SHELXL-97<sup>6</sup> incorporated in Olex2 crystallographic package.<sup>7</sup> All calculations and structure refinements were performed using Olex2 programme. The hydrogen atoms were fixed at the calculated positions using the isotropic thermal parameters whereas non-hydrogen atoms were refined anisotropically. The hydrogen atoms of the coordinated as well as uncoordinated water molecules could not be located from the Fourier map; however, their contributions are included in the empirical formulae. The crystallographic data collection and structure solution parameters are presented in Tables S1 and S5 whereas selected bond distances and bond angles are presented in Tables S2 and S3; and Tables S6 and S7. CCDC Nos. 2282501 (**1**) and 2282500 (**2**) contain the supplementary crystallographic data for this paper.

### Fluorescence spectral measurements

For sensing studies, 1 mg of MOF **1** was suspended in 4 mL of water, followed by 30 min of ultrasonication. Stock solutions of metal salts (2.5 mM; HgCl<sub>2</sub>, PtCl<sub>2</sub>, Cu(OAc)<sub>2</sub>, AgNO<sub>3</sub>, Pb(OAc)<sub>2</sub>, Co(OAc)<sub>2</sub>, Zn(OAc)<sub>2</sub>, Cd(OAc)<sub>2</sub>, Mg(NO<sub>3</sub>)<sub>2</sub>, CrCl<sub>3</sub>, NiCl<sub>2</sub>, Mn(OAc)<sub>2</sub>, NaCl, KCl, Al(NO<sub>3</sub>)<sub>3</sub>, FeCl<sub>2</sub>, CuCl, and PdCl<sub>2</sub> were prepared in H<sub>2</sub>O. All fluorescence spectral experiments were performed with a 1.0 cm path length cuvette at 25±1 °C in H<sub>2</sub>O.

### Determination of Stern-Volmer ( $K_{SV}$ ) and binding ( $K_b$ ) constants

Stern-Volmer constants ( $K_{SV}$ ) were calculated using the Stern-Volmer equation (1), where  $I_0$  and  $I$  are the emission intensities of **1** in the absence and presence of a metal ion used as a quencher (Q), respectively.<sup>8,9</sup> The binding constants ( $K_b$ ) were computed using the Benesi-Hildebrand equation (2),<sup>10</sup> where  $I$  is the emission intensity of **1** in the presence of [Cu<sup>+</sup>] or [Pd<sup>2+</sup>] ions at 435 nm, respectively;  $I_0$  is the intensity of **1** in the absence of [Cu<sup>+</sup>] or [Pd<sup>2+</sup>] ions; and  $I_{min}$  is the minimum fluorescence intensity in the presence of [Cu<sup>+</sup>] or [Pd<sup>2+</sup>] ions.  $K_b$  was obtained by a ratio of intercept and slope in  $1/(I-I_0)$  vs.  $1/[M]$  plot, where M refers to a respective metal ion.

$$I_0/I = 1 + K_{SV}[M] \quad (1)$$

$$1/(I-I_0) = 1/\{K_b(I_0 - I_{min})[M]\} + 1/(I_0 - I_{min}) \quad (2)$$

### Determination of detection limit

The detection limits were calculated using the equation (3), where  $k$  is the slope of a plot of fluorescence intensity of **1** at 435 nm vs. metal ion concentration and  $\sigma$  is the standard deviation of ten blank fluorescence measurements of **1**.<sup>11</sup>

$$\text{Detection limit} = 3\sigma/k \quad (3)$$

### Inclusion studies

30 mg sample of MOF **1** was suspended in MeCN and impregnated with 5 equiv. of Cu<sup>+</sup> or Pd<sup>2+</sup> ions for 12 h at 25 °C. The impregnated sample was filtered, washed thrice with fresh MeCN, and dried under vacuum. This sample was used for the characterization.

### Calculation of overlap integral

The overlap integral between the emission spectrum of **1** and the absorption spectrum of Pd<sup>2+</sup> ion was calculated using the equation (4).<sup>12</sup>

$$J(\lambda) = \int_0^{\infty} F_D(\lambda) \varepsilon_A(\lambda) \lambda^4 d\lambda \quad (4)$$

Herein,  $\lambda$  is wavelength,  $F_D(\lambda)$  represents the normalized emission intensity of the donor **1** (normalized to unity) and  $\varepsilon_A(\lambda)$  is the molar extinction coefficient of the acceptor (Pd<sup>2+</sup> ion) in mol<sup>-1</sup>cm<sup>-1</sup>.

### Fabrication of filter paper strips

Strips of Whatman filter paper were dipped in a suspension of **1** followed by drying in air to prepare the test strips. Such **1**-coated test strips were directly dipped into an aqueous solution of either Cu<sup>+</sup> or Pd<sup>2+</sup> ion. These test strips were then investigated under the UV light.

### References

1. D. D. Perrin, W. L. F. Armarego, D. R. Perin, Purification of Laboratory Chemicals, Pergamon Press: Oxford, UK, 1980.
2. CrysAlisPro, v. 1.171.33.49b; Oxford Diffraction Ltd., 2009.
3. SMART & SAINT Software Reference Manual, Version 6.45; Bruker Analytical X-Ray Systems, Inc., Madison, 2003.
4. G. M. Sheldrick, SADABS, A software for empirical absorption correction, Ver. 2.05; University of Göttingen: Göttingen, Germany, 2002.
5. A. Altomare, G. Cascarano, C. Giacovazzo, A. Guagliardi, M. C. Burla, G. Polidori and M. Camalli, *J. Appl. Crystallogr.*, 1994, **27**, 435–435.
6. G. M. Sheldrick, A short history of SHELX. *Acta Crystallogr. A*, 2008, **64**, 112–122.

7. O. V. Dolomanov, L. J. Bourhis, R. J. Gildea, J. A. K. Howard and H. Puschmann, OLEX2: a complete structure solution, refinement and analysis program. *J. Appl. Crystallogr.*, 2009, **42**, 339–341.
8. P. Kumar, V. Kumar, S. Pandey and R. Gupta, *Dalton Trans.*, 2018, **47**, 9536–9545.
9. P. Kumar, V. Kumar and R. Gupta, *Dalton Trans.*, 2017, **46**, 10205–10209.
10. H. A. Benesi and J. H. Hildebrand, *J. Am. Chem. Soc.*, 1949, **71**, 2703–2707.
11. H. Goyal, S. Pachisia and R. Gupta, *Cryst. Growth Des.*, 2020, **20**, 6117–6128.
12. J. R. Lakowicz, Ed., *Principles of Fluorescence Spectroscopy*, 3rd Ed., Springer, Singapore, 2010, pp. 443–472.

## **List of Figures**

**Figure S1.** FTIR spectrum of **L1**.

**Figure S2.**  $^1\text{H}$  NMR spectrum of **L1** in  $\text{DMSO-}d_6$  solvent where \* represents the residual solvent and/or adventitious water peaks.

**Figure S3.**  $^{13}\text{C}$  NMR spectrum of **L1** in  $\text{DMSO-}d_6$  solvent where \* represents the residual solvent peak.

**Figure S4.** FTIR spectrum of **L2**.

**Figure S5.**  $^1\text{H}$  NMR spectrum of **L2** in  $\text{DMSO-}d_6$  solvent where \* represents the residual solvent and/or adventitious water peaks.

**Figure S6.**  $^{13}\text{C}$  NMR spectrum of **L2** in  $\text{DMSO-}d_6$  solvent where \* represents the residual solvent peak.

**Figure S7.** FTIR spectrum of ligand **L3**.

**Figure S8.**  $^1\text{H}$  NMR spectrum of ligand **L3** in  $\text{DMSO-}d_6$  solvent where \* represents the residual solvent and/or adventitious water peaks.

**Figure S9.**  $^{13}\text{C}$  NMR spectrum of ligand **L3** in  $\text{DMSO-}d_6$  solvent where \* represents the residual and/or adventitious solvent peaks.

**Figure S10.** FTIR spectrum of MOF **1**.

**Figure S11.** Thermal Gravimetric Analysis (TGA, black trace) and Differential Scanning Calorimetric (DSC, blue trace) plots for MOF **1**.

**Figure S12.** EDX spectrum of MOF **1**.

**Figure S13.** X-ray powder diffraction patterns for as-synthesized MOF **1** (red trace) and the one simulated from Mercury 3.0 using the single crystal diffraction data (black trace).

**Figure S14.** (a) X-ray powder diffraction patterns of as-synthesized MOF **1**, its simulated patterns, and after treatment in different (a) pHs and (b) organic solvents.

**Figure S15.**  $\text{N}_2$  sorption isotherm measured for MOF **1** at 77 K. Black and red traces respectively denote sorption and desorption plots. Inset shows the pore size distribution plot.

**Figure S16.** Emission spectra of MOF **1** recorded in different solvents.

**Figure S17.** Solid-state fluorescence spectrum of MOF **1**.

**Figure S18.** Determination of binding constants by Benesi-Hildebrand plots for the detection of (a)  $\text{Cu}^+$  and (b)  $\text{Pd}^{2+}$  ion by **1** from the emission spectral profiles.

**Figure S19.** Determination of detection limits for (a)  $\text{Cu}^+$  and (b)  $\text{Pd}^{2+}$  ions by **1** from the emission spectral titrations.

**Figure S20.** Job's plot showing a 1:1 stoichiometry of **1** towards (a)  $\text{Cu}^+$  and (b)  $\text{Pd}^{2+}$  ions.

**Figure S21.** Mole ratio method showing a 1:1 stoichiometry of **1** towards (a)  $\text{Cu}^+$  and (b)  $\text{Pd}^{2+}$  ions.

**Figure S22.** Change in the emission spectra of **1** as a function of time in the presence of (a)  $\text{Cu}^+$  ion (28  $\mu\text{M}$ ) and (b)  $\text{Pd}^{2+}$  ion (32  $\mu\text{M}$ ). Both insets show the response time of **1** for the detection of  $\text{Cu}^+$  and  $\text{Pd}^{2+}$  ions, respectively.

**Figure S23.** (a) Selectivity of **1** towards  $\text{Cu}^+$  ion in the presence of other metal ions: **1** + metal ions (red pillars) and **1** + metal ions +  $\text{Cu}^+$  ion (green pillars). (b) Selectivity of **1** toward  $\text{Pd}^{2+}$  ion in the presence of other metal ions: **1** + metal ions (yellow pillars) and **1** + metal ions +  $\text{Pd}^{2+}$  ion (blue pillars). All studies were performed in an aqueous medium.

**Figure S24.** Quenching efficiency of **1** towards  $\text{Cu}^+$  ion (28  $\mu\text{M}$ , green pillars) and  $\text{Pd}^{2+}$  ion (32  $\mu\text{M}$ , orange pillars) having different anions.

**Figure S25.** X-ray powder diffraction patterns for as-synthesized **1** (red trace); its simulated one (black trace); and after reaction with  $\text{Cu}^+$  (purple trace) and  $\text{Pd}^{2+}$  (blue trace) ions.

**Figure S26.** SEM images of (a) MOF **1**, (b) **1**-Cu and (c) **1**-Pd.

**Figure S27.** FTIR spectra of MOF **1** (black trace), **1**-Cu (blue trace) and **1**-Pd (red trace).

**Figure S28.** Solid-state  $^{13}\text{C}$  NMR spectra of **1** in the absence (brown trace) and presence of 5 equiv. of  $\text{Cu}^+$  (green trace) and  $\text{Pd}^{2+}$  (blue trace) ions.

**Figure S29.**  $\zeta$  potential plots for (a) **1**, (b) **1**-Pd and (c) **1**-Cu.

**Figure S30.** XPS spectra of (a) **1**, **1**-Cu and **1**-Pd showing C1s region. (b) **1**, **1**-Cu and **1**-Pd showing O1s region. (c) **1**-Cu showing Cu2p region. (d) **1**-Pd showing Pd3d region.

**Figure S31.** EDX spectra for (a) **1**-Cu and (b) **1**-Pd.

**Figure S32.** FTIR spectrum of **L4**.

**Figure S33.**  $^1\text{H}$  NMR spectrum of **L4** in  $\text{DMSO}-d_6$  solvent where \* represents the residual solvent and/or adventitious water peaks.

**Figure S34.**  $^{13}\text{C}$  NMR spectrum of **L4** in  $\text{DMSO}-d_6$  solvent where \* represents the residual and/or adventitious solvent peaks.

**Figure S35.** FTIR spectrum of ligand **L5**.

**Figure S36.**  $^1\text{H}$  NMR spectrum of ligand **L5** in  $\text{DMSO}-d_6$  solvent where \* represents the residual solvent and/or adventitious water peaks.

**Figure S37.**  $^{13}\text{C}$  NMR spectrum of ligand **L5** in  $\text{DMSO}-d_6$  solvent where \* represents the residual and/or adventitious solvent peaks.

**Figure S38.** FTIR spectrum of MOF **2**.

**Figure S39.** X-ray powder diffraction patterns for as-synthesized MOF **2** (red trace) and the one simulated from Mercury 3.0 using the single crystal diffraction data (black trace).

**Figure S40.** Emission spectra of MOF **2** recorded in different solvents.

**Figure S41.** Bar diagram showing relative emission intensity of MOFs **1** and **2** in different solvents.

**Figure S42.** Solid-state fluorescence spectrum of MOF **2**.

**Figure S43.** Emission spectra of MOF **2** in the presence of 50  $\mu\text{M}$  of  $\text{Cu}^+$  and  $\text{Pd}^{2+}$  ions.

### **List of Tables**

**Table S1.** Crystallographic data collection and structure refinement parameters for MOF **1**.

**Table S2.** Selected bond distances ( $\text{\AA}$ ) for MOF **1**.

**Table S3.** Selected bond angles ( $^\circ$ ) for MOF **1**.

**Table S4.** Fluorescence lifetime parameters for **1**, **1** +  $\text{Pd}^{2+}$  and **1** +  $\text{Cu}^+$ .

**Table S5.** Crystallographic data collection and structure refinement parameters for MOF **2**.

**Table S6.** Selected bond distances ( $\text{\AA}$ ) for MOF **2**.

**Table S7.** Selected bond angles ( $^\circ$ ) for MOF **2**.

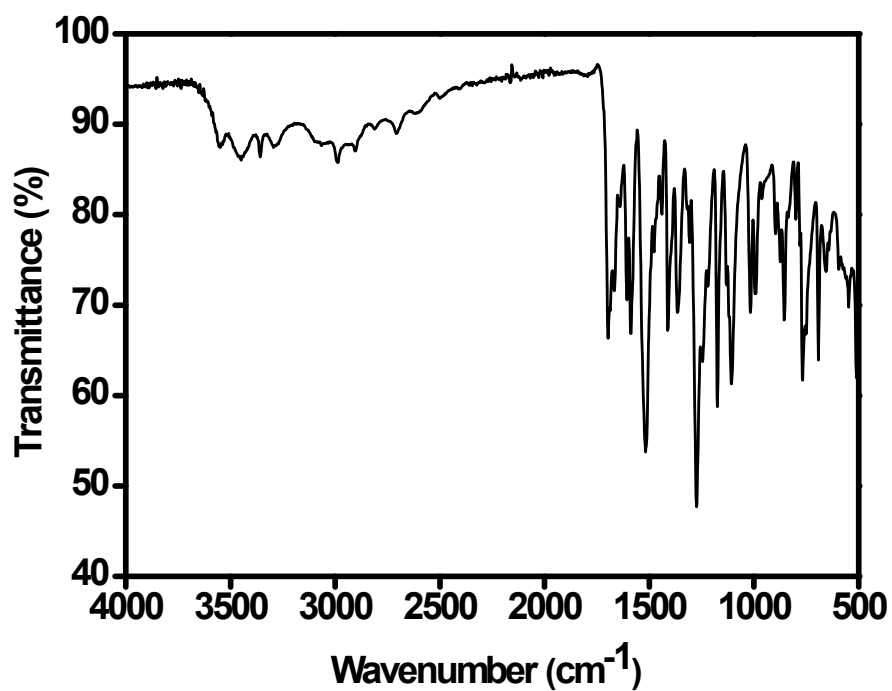

Figure S1. FTIR spectrum of L1.

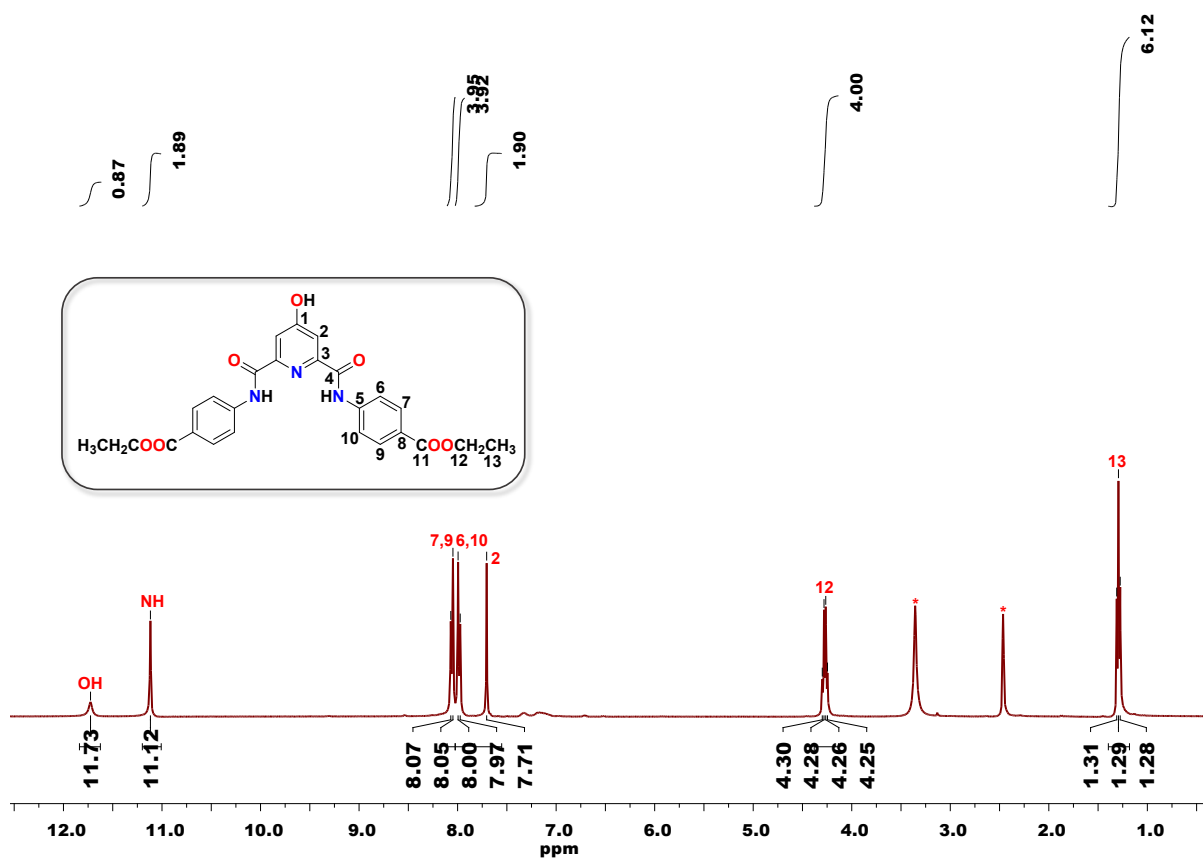

Figure S2. <sup>1</sup>H NMR spectrum of L1 in DMSO-*d*<sub>6</sub> solvent where \* represents the residual solvent and/or adventitious water peaks.



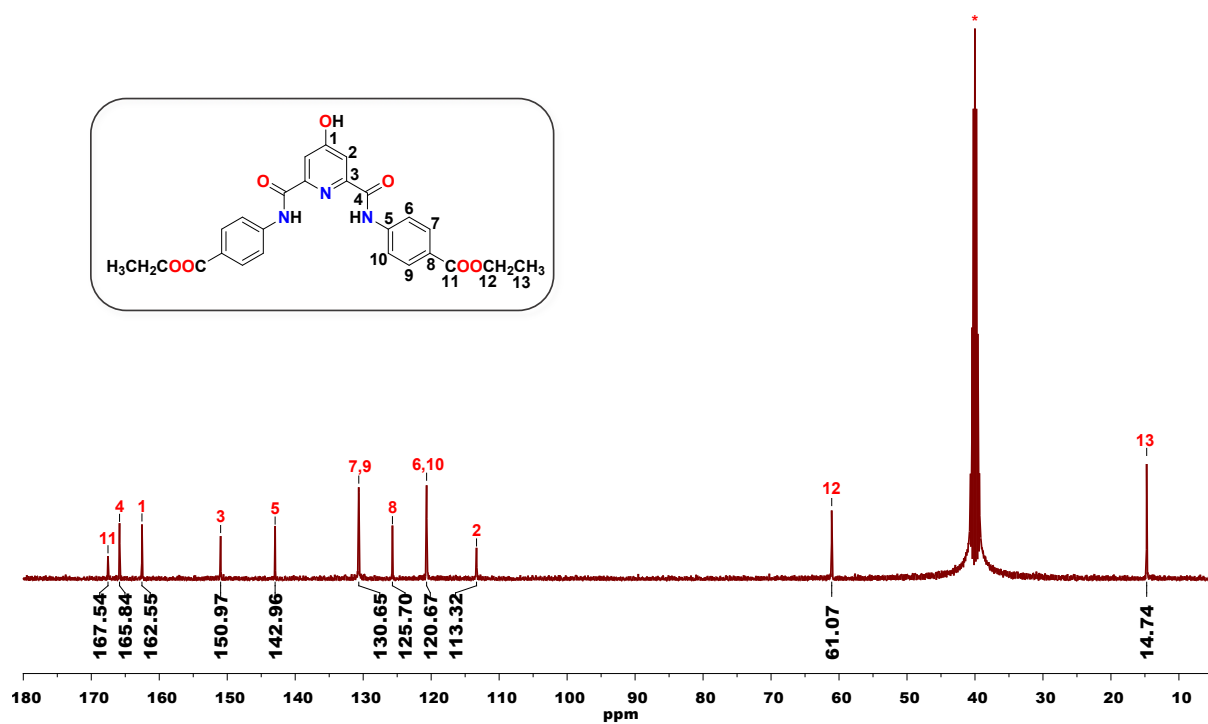

**Figure S3.** <sup>13</sup>C NMR spectrum of L1 in DMSO-*d*<sub>6</sub> solvent where \* represents the residual solvent peak.

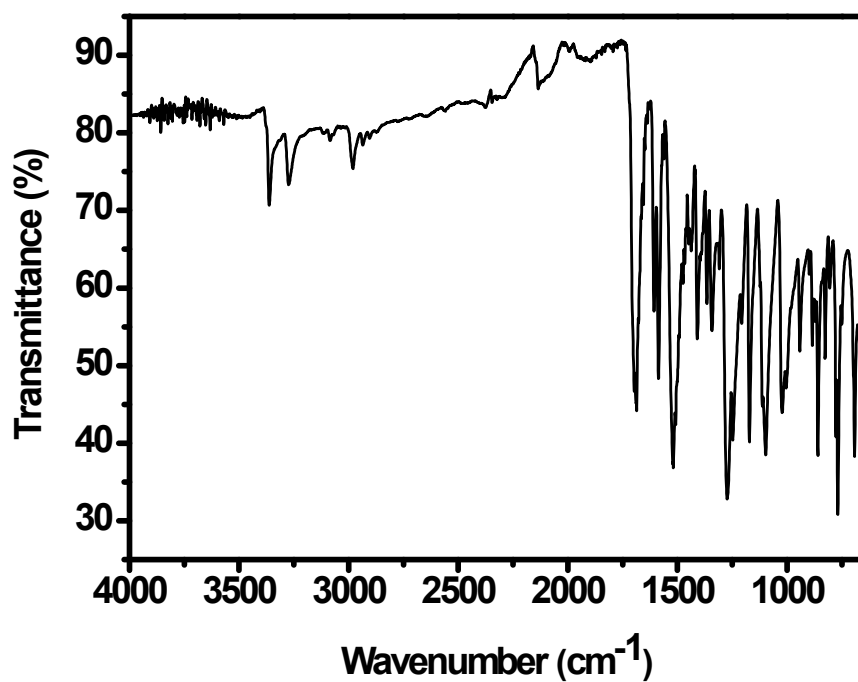

**Figure S4.** FTIR spectrum of L2.

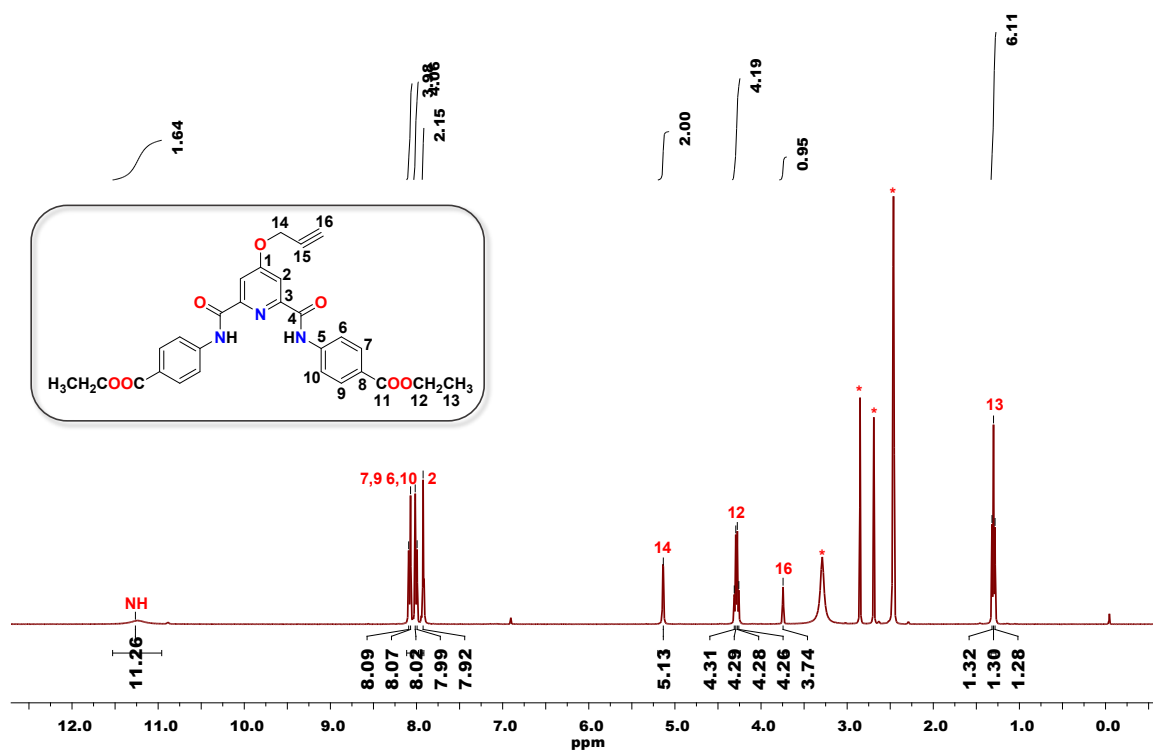

**Figure S5.**  $^1\text{H}$  NMR spectrum of L2 in  $\text{DMSO-}d_6$  solvent where \* represents the residual solvent and/or adventitious water peaks.

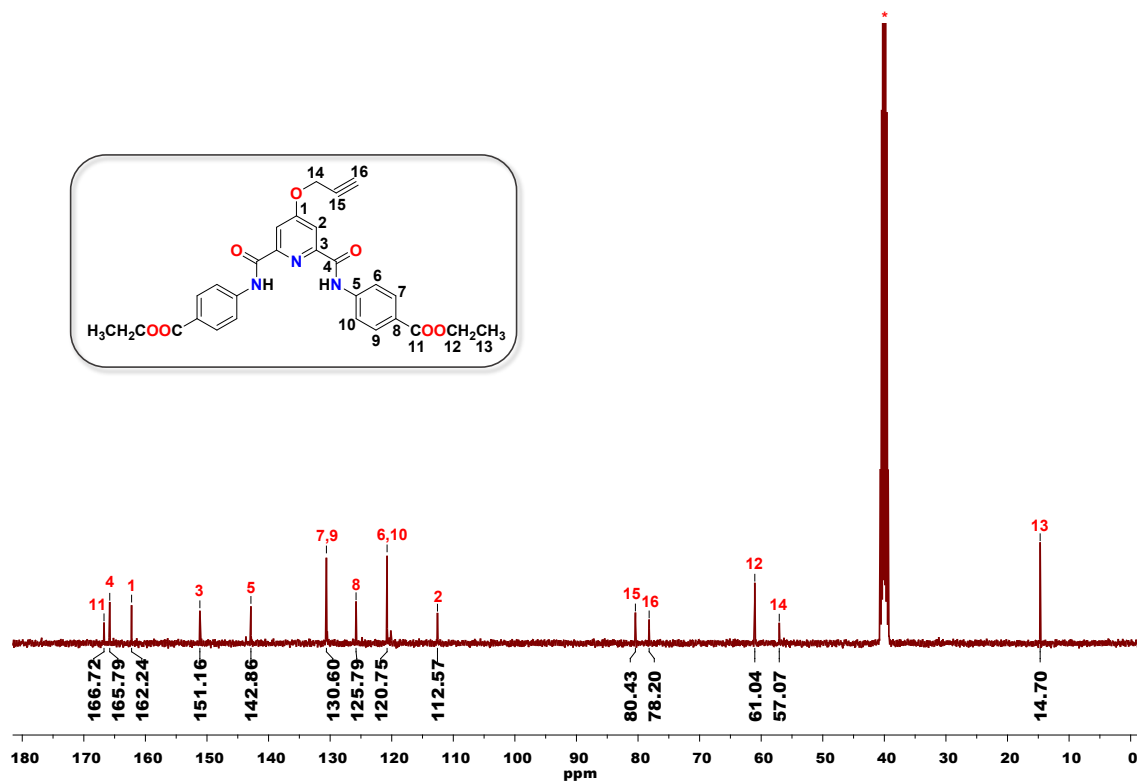

**Figure S6.**  $^{13}\text{C}$  NMR spectrum of L2 in  $\text{DMSO-}d_6$  solvent where \* represents the residual solvent peak.

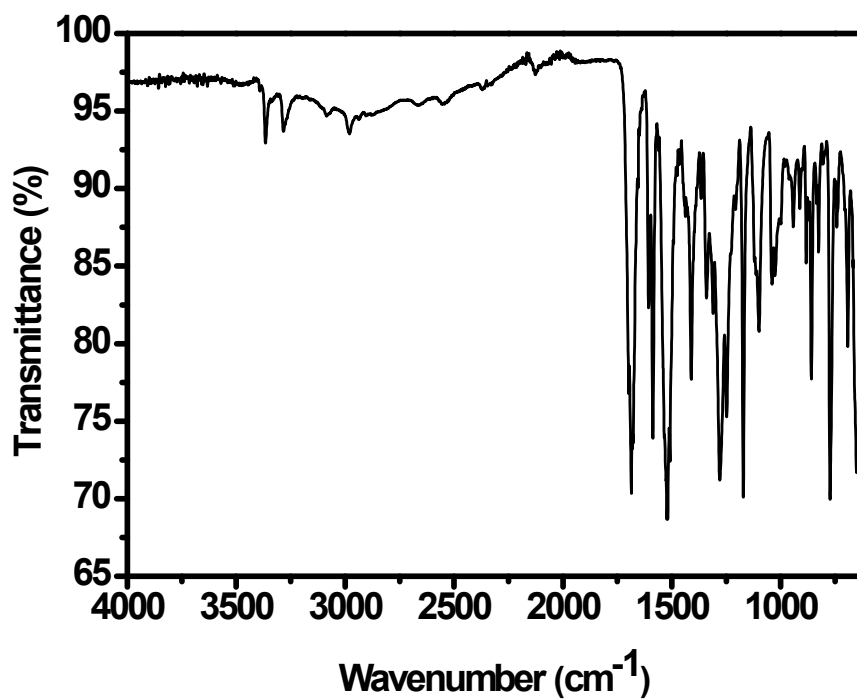

Figure S7. FTIR spectrum of ligand L3.

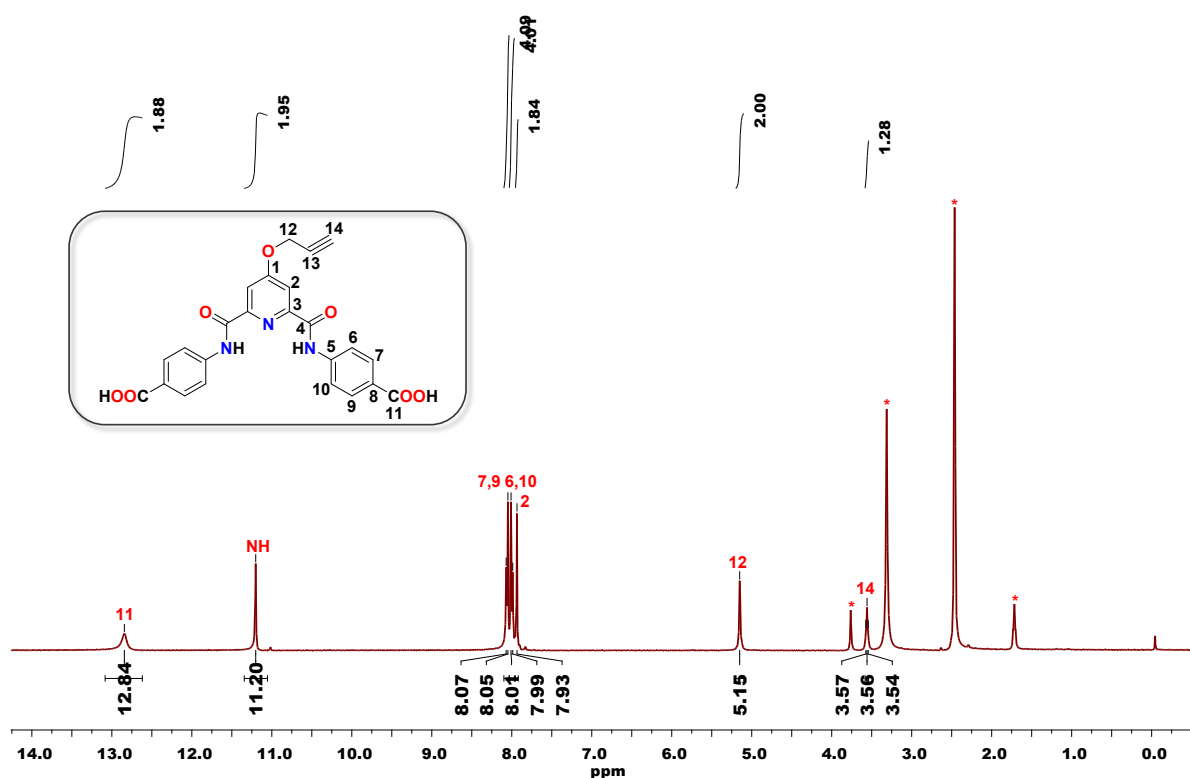

Figure S8.  $^1\text{H}$  NMR spectrum of ligand L3 in  $\text{DMSO-}d_6$  solvent where \* represents the residual solvent and/or adventitious water peaks.

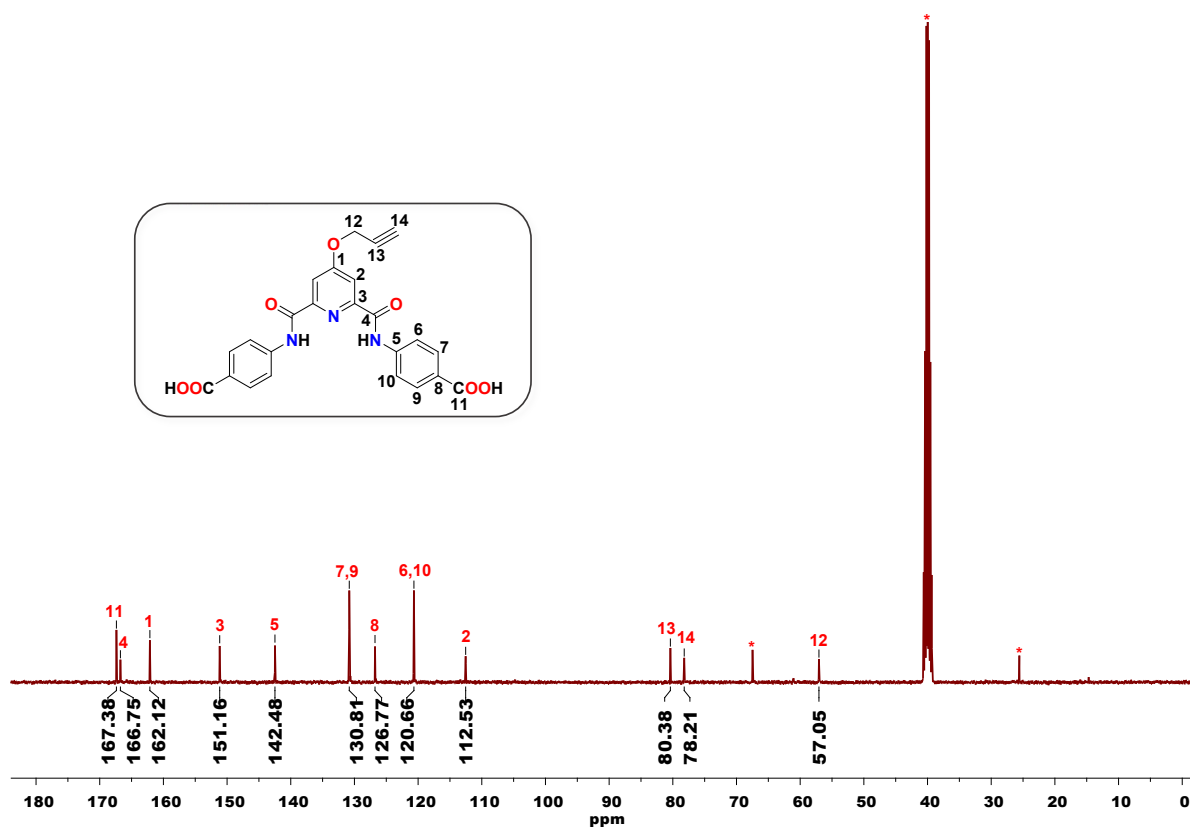

**Figure S9.** <sup>13</sup>C NMR spectrum of ligand L3 in DMSO-*d*<sub>6</sub> solvent where \* represents the residual and/or adventitious solvent peaks.

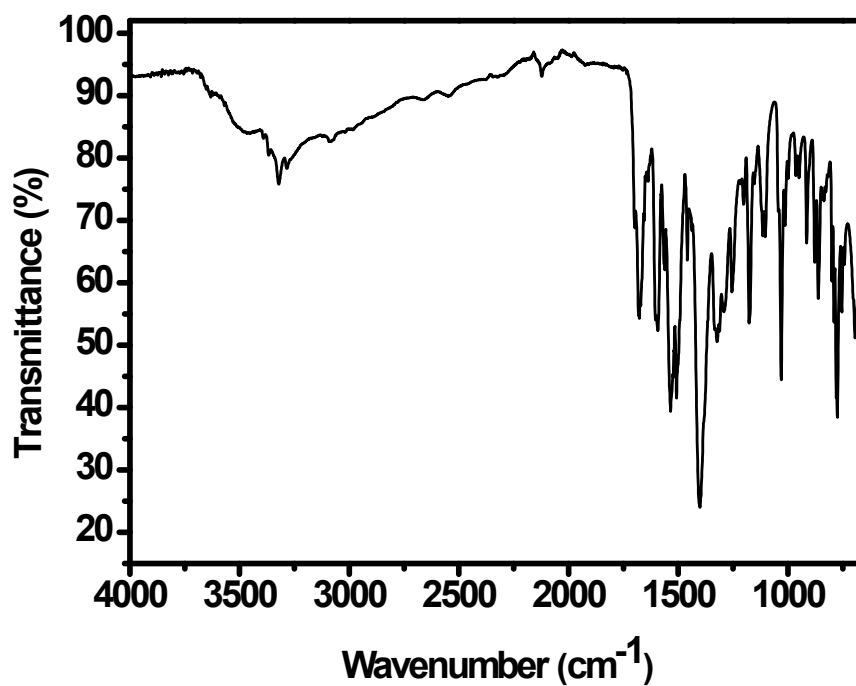

**Figure S10.** FTIR spectrum of MOF 1.

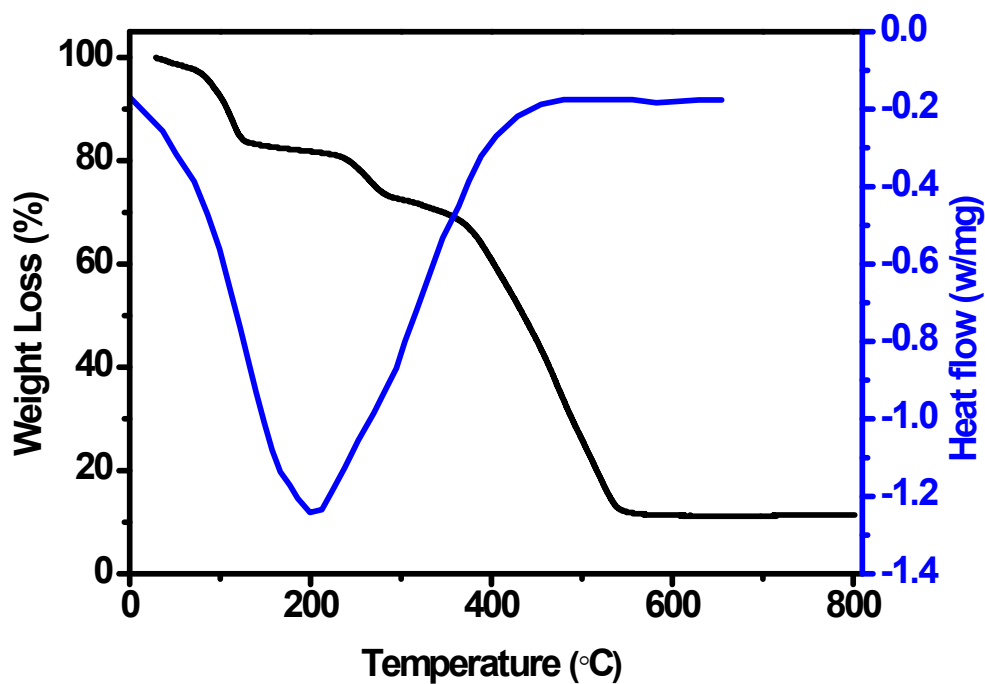

**Figure S11.** Thermal Gravimetric Analysis (TGA, black trace) and Differential Scanning Calorimetric (DSC, blue trace) plots for MOF **1**.

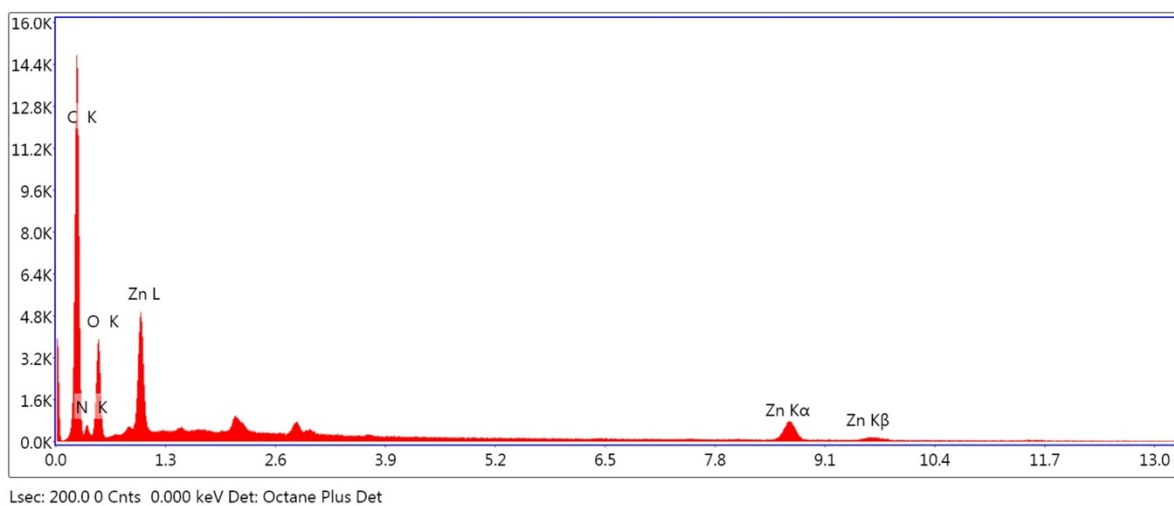

**Figure S12.** EDX spectrum of MOF **1**.

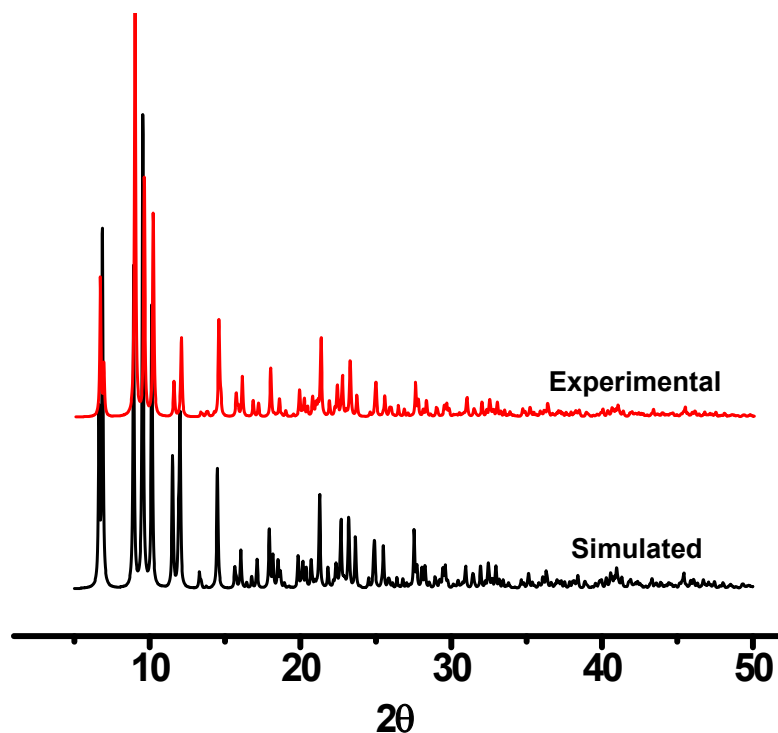

**Figure S13.** X-ray powder diffraction patterns for as-synthesized MOF **1** (red trace) and the one simulated from Mercury 3.0 using the single crystal diffraction data (black trace).

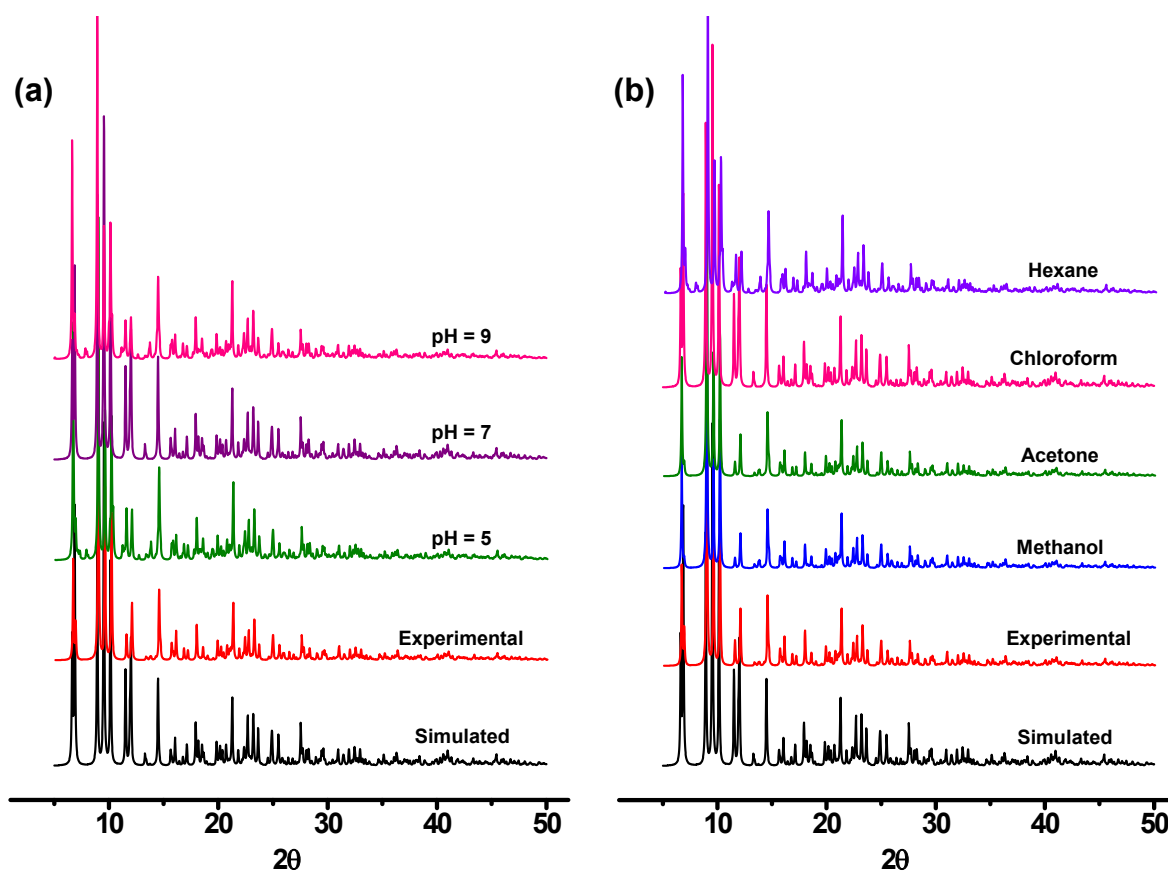

**Figure S14.** (a) X-ray powder diffraction patterns of as-synthesized MOF **1**, its simulated patterns, and after treatment in different (a) pHs and (b) organic solvents.

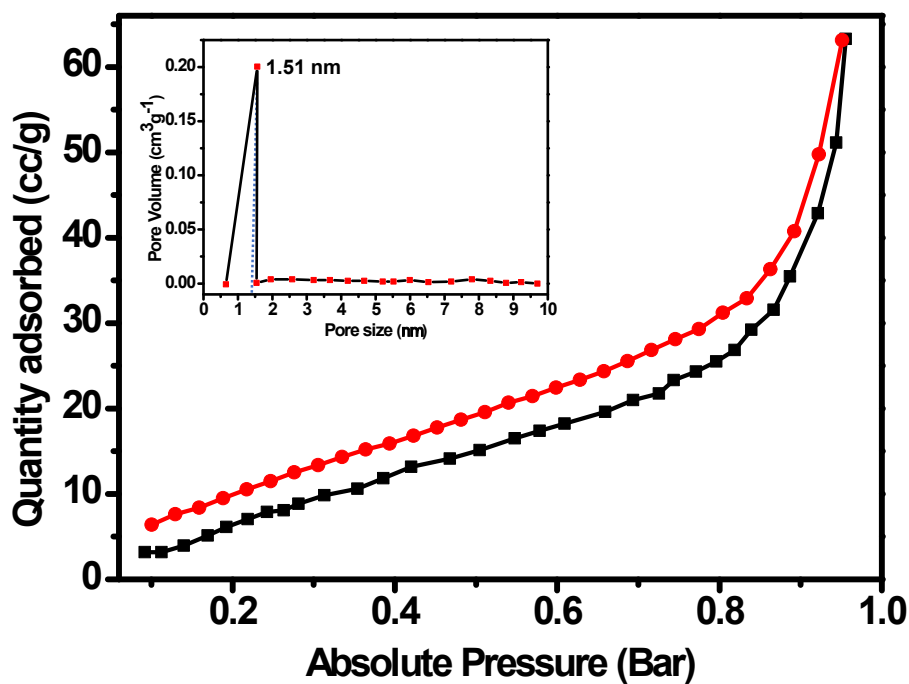

**Figure S15.** N<sub>2</sub> sorption isotherm measured for MOF 1 at 77 K. Black and red traces respectively denote sorption and desorption plots. Inset shows the pore size distribution plot.

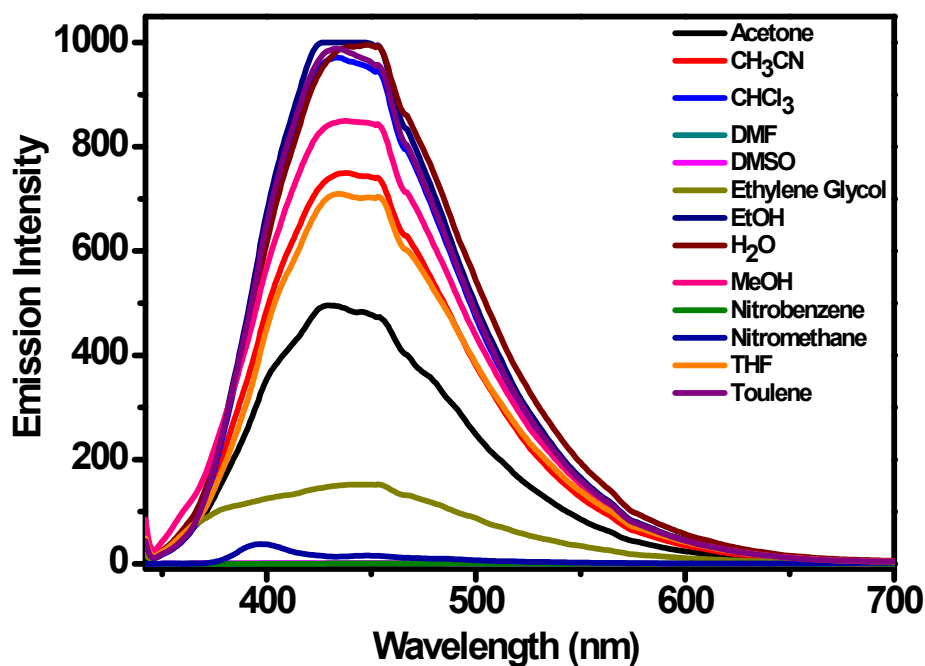

**Figure S16.** Emission spectra of MOF 1 recorded in different solvents.

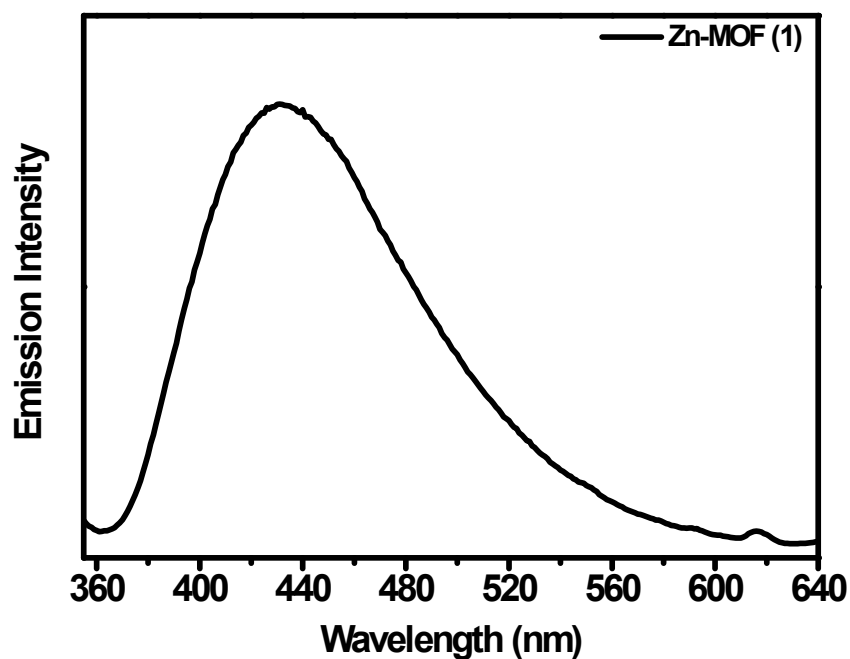

Figure S17. Solid-state fluorescence spectrum of MOF 1.

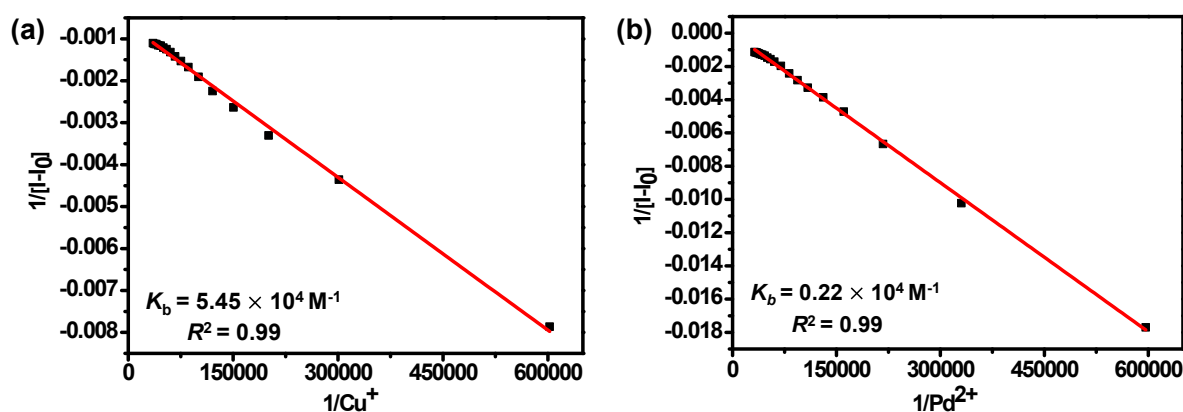

Figure S18. Determination of binding constants by Benesi-Hildebrand plots for the detection of (a)  $\text{Cu}^+$  and (b)  $\text{Pd}^{2+}$  ion by **1** from the emission spectral profiles.

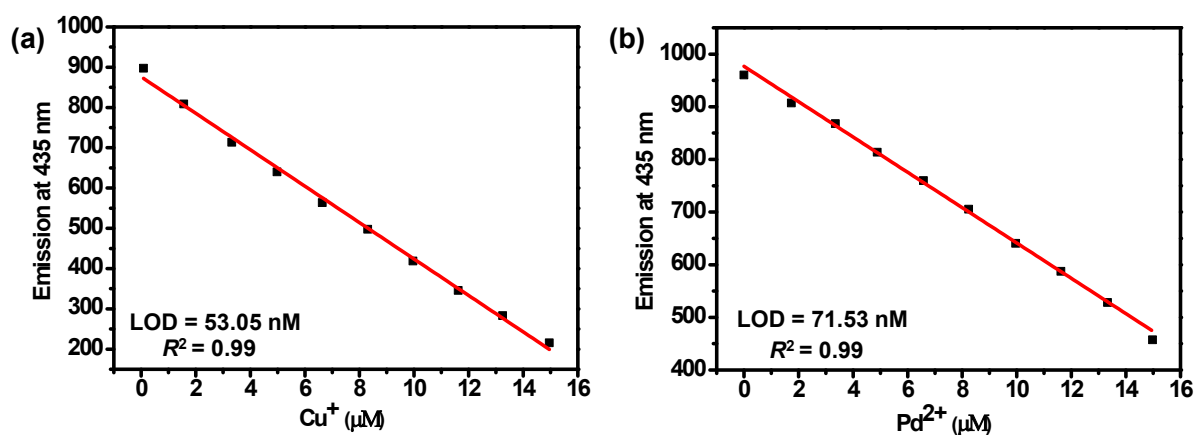

Figure S19. Determination of detection limits for (a)  $\text{Cu}^+$  and (b)  $\text{Pd}^{2+}$  ions by **1** from the emission spectral titrations.



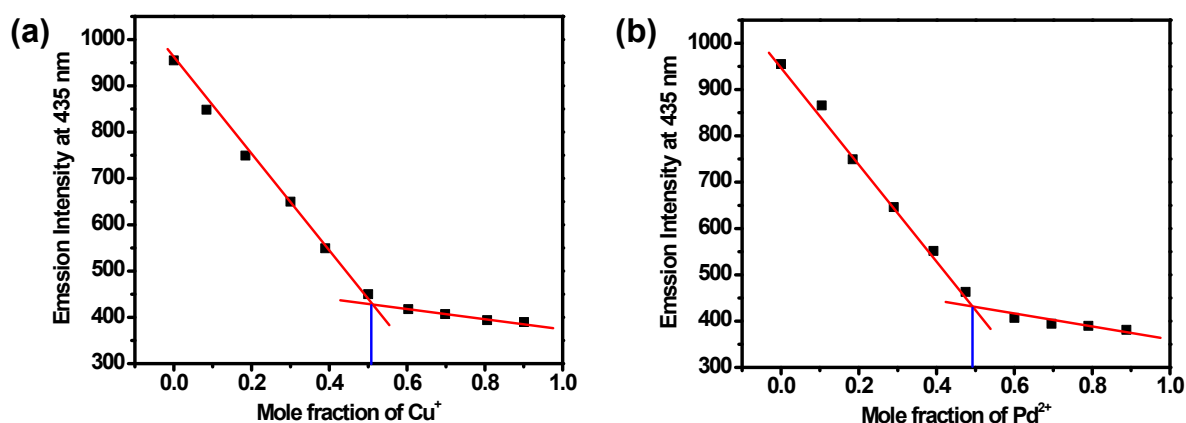

Figure S20. Job's plot showing a 1:1 stoichiometry of **1** towards (a)  $\text{Cu}^+$  and (b)  $\text{Pd}^{2+}$  ions.

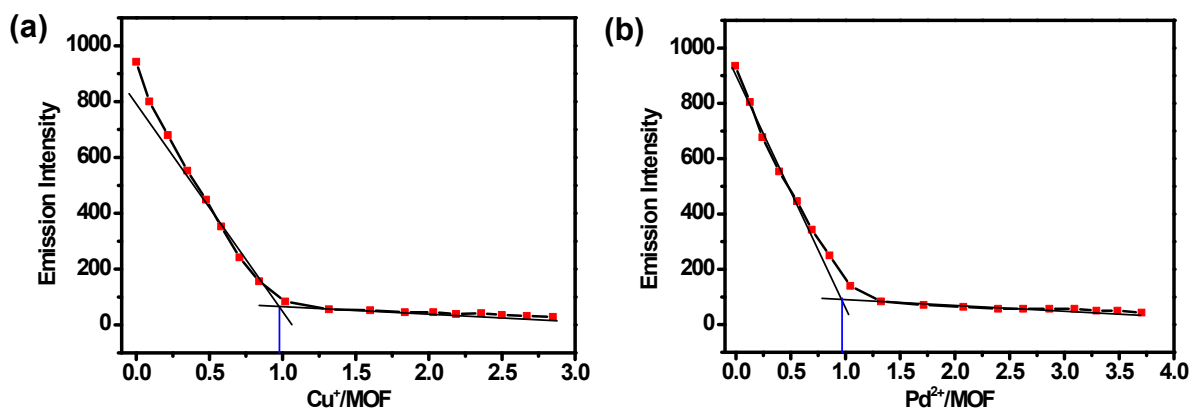

Figure S21. Mole ratio method showing a 1:1 stoichiometry of **1** towards (a)  $\text{Cu}^+$  and (b)  $\text{Pd}^{2+}$  ions.

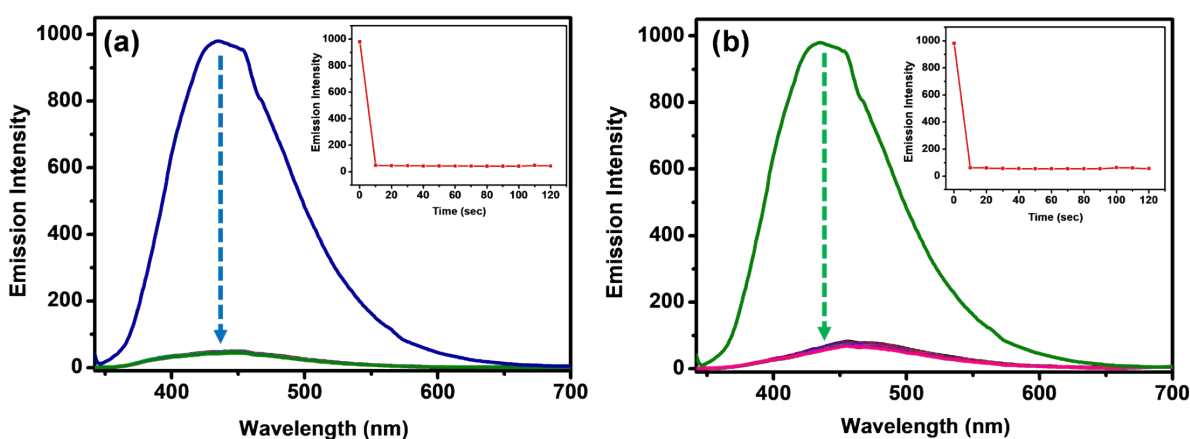

Figure S22. Change in the emission spectra of **1** as a function of time in the presence of (a)  $\text{Cu}^+$  ion (28  $\mu\text{M}$ ) and (b)  $\text{Pd}^{2+}$  ion (32  $\mu\text{M}$ ). Both insets show the response time of **1** for the detection of  $\text{Cu}^+$  and  $\text{Pd}^{2+}$  ions, respectively.

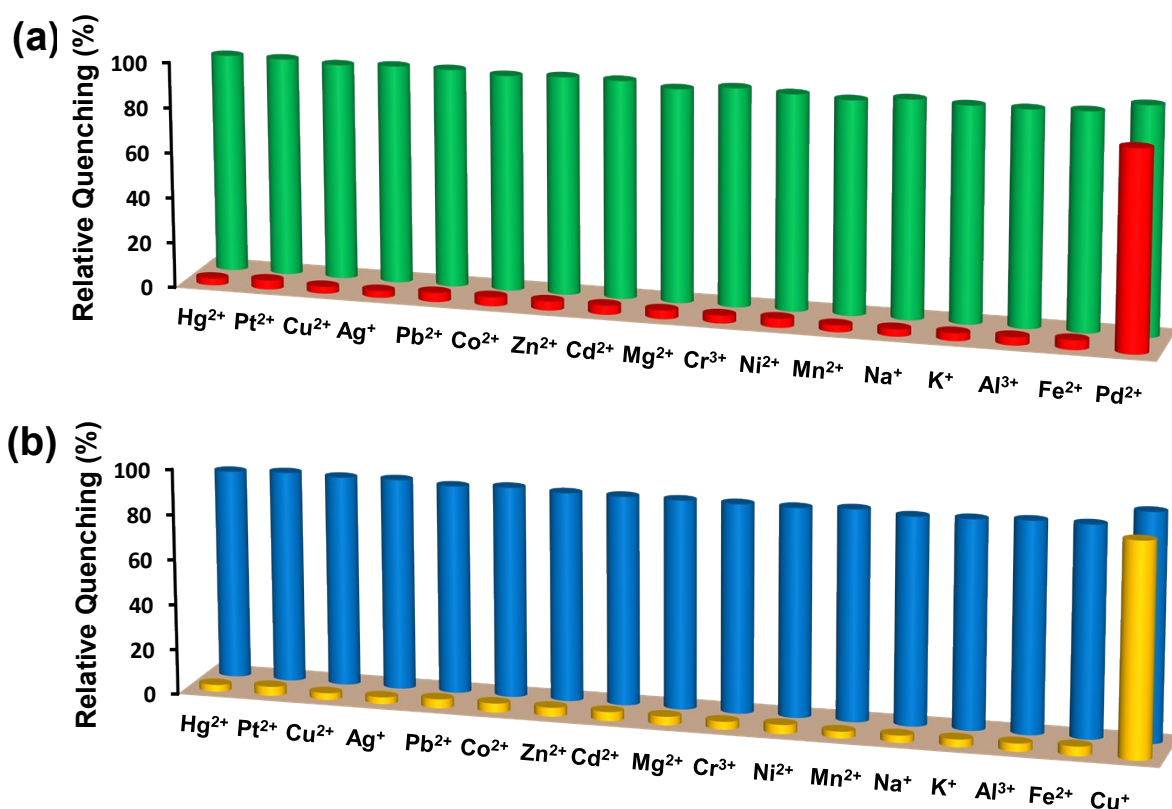

**Figure S23.** (a) Selectivity of **1** toward Cu<sup>+</sup> ion in the presence of other metal ions: **1** + metal ions (red pillars) and **1** + metal ions + Cu<sup>+</sup> ion (green pillars). (b) Selectivity of **1** toward Pd<sup>2+</sup> ion in the presence of other metal ions: **1** + metal ions (yellow pillars) and **1** + metal ions + Pd<sup>2+</sup> ion (blue pillars). All studies were performed in an aqueous medium.

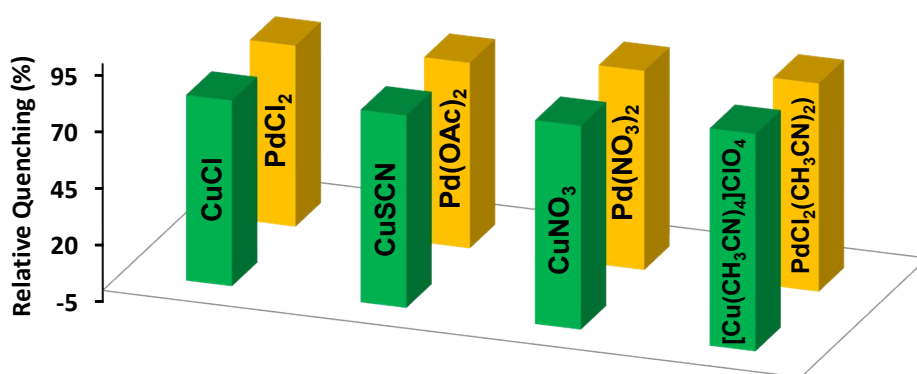

**Figure S24.** Quenching efficiency of MOF **1** towards Cu<sup>+</sup> ion (28 μM, green pillars) and Pd<sup>2+</sup> ion (32 μM, orange pillars) having different anions.

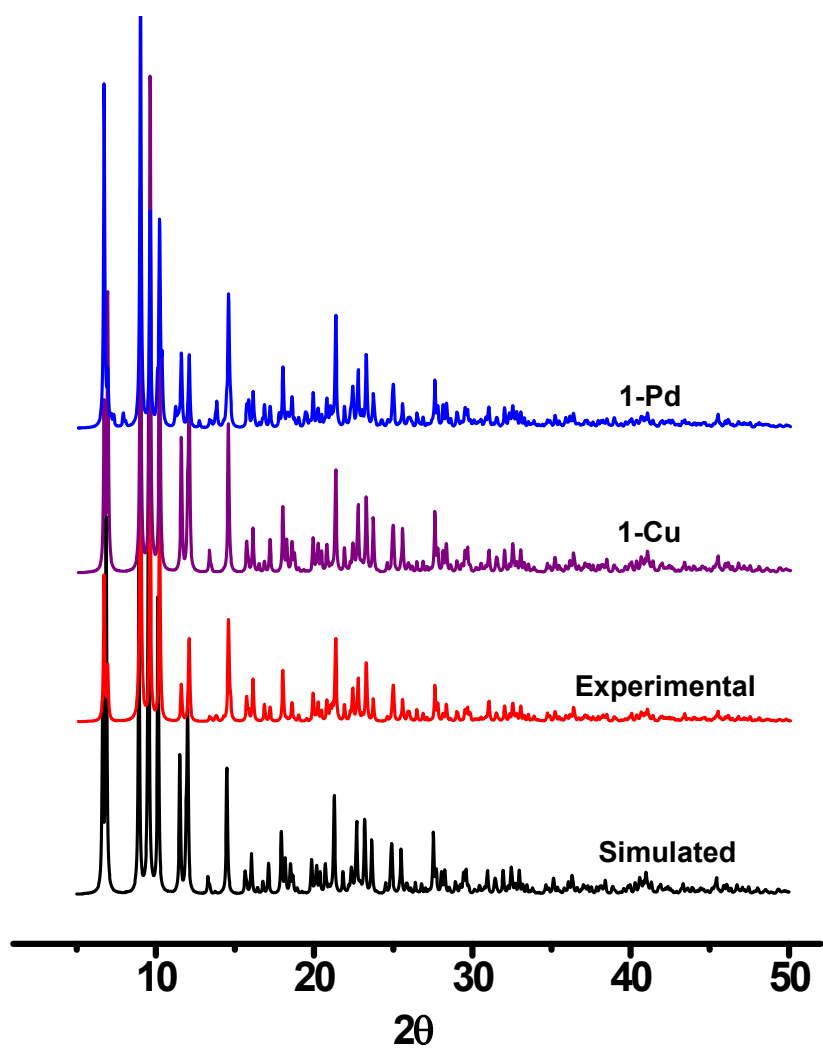

**Figure S25.** X-ray powder diffraction patterns for as-synthesized **1** (red trace); its simulated one (black trace); and after reaction with  $\text{Cu}^+$  (purple trace) and  $\text{Pd}^{2+}$  (blue trace) ions.

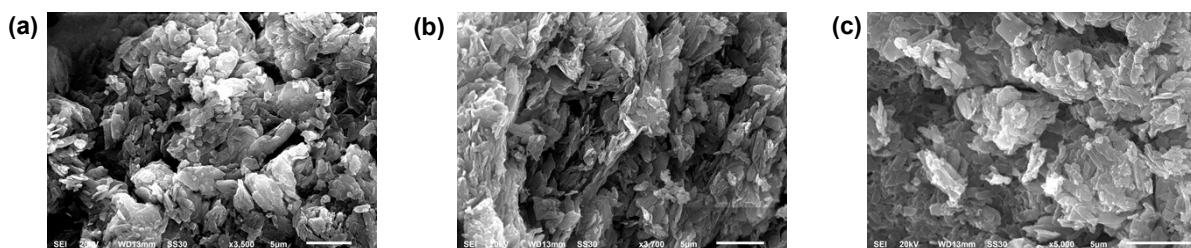

**Figure S26.** SEM images of (a) MOF **1**, (b) **1-Cu** and (c) **1-Pd**.

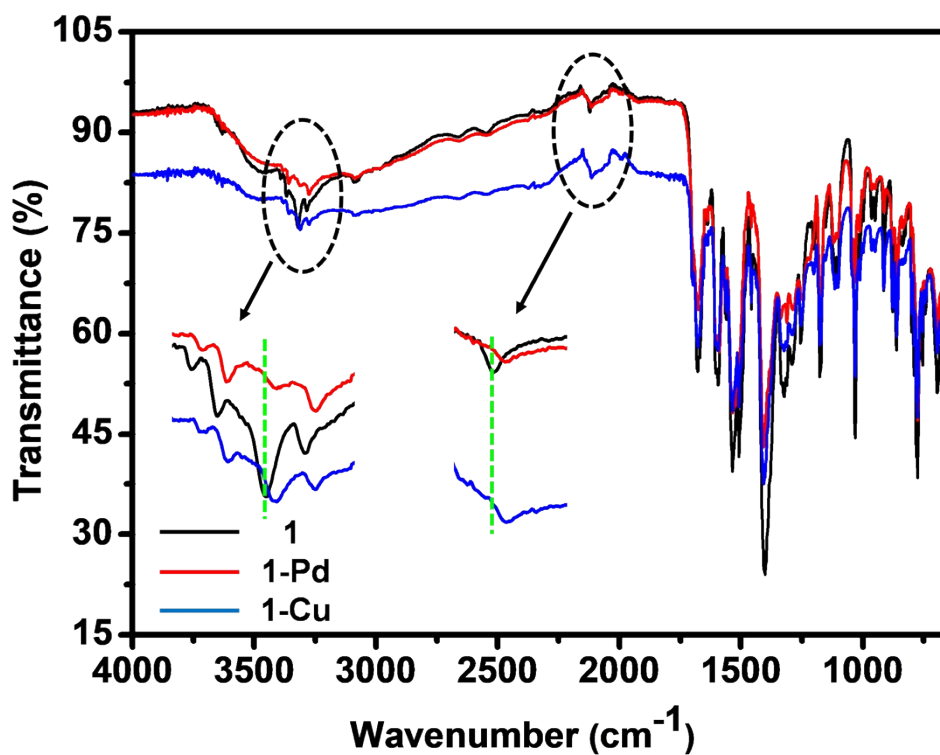

Figure S27. FTIR spectra of MOF **1** (black trace), **1-Cu** (blue trace) and **1-Pd** (red trace).

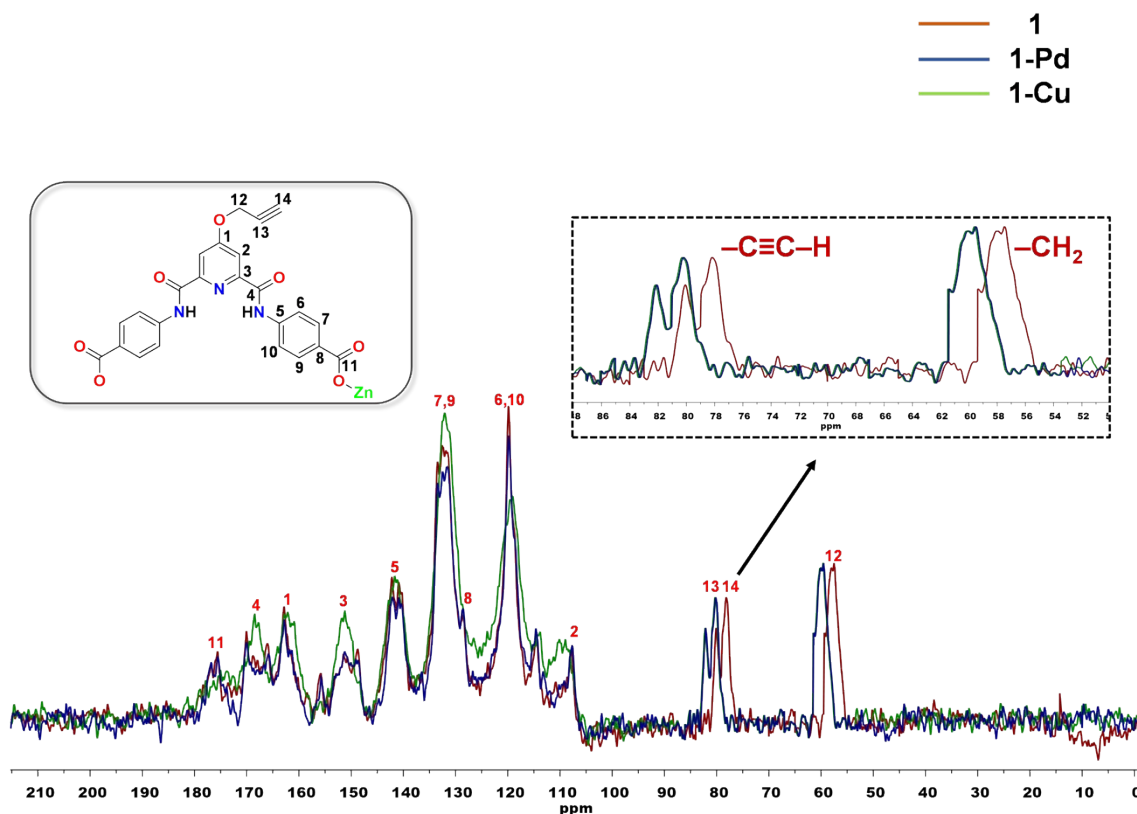

Figure S28. Solid-state  $^{13}\text{C}$  NMR spectra of **1** in the absence (brown trace) and presence of 5 equiv. of  $\text{Cu}^+$  (green trace) and  $\text{Pd}^{2+}$  (blue trace) ions.

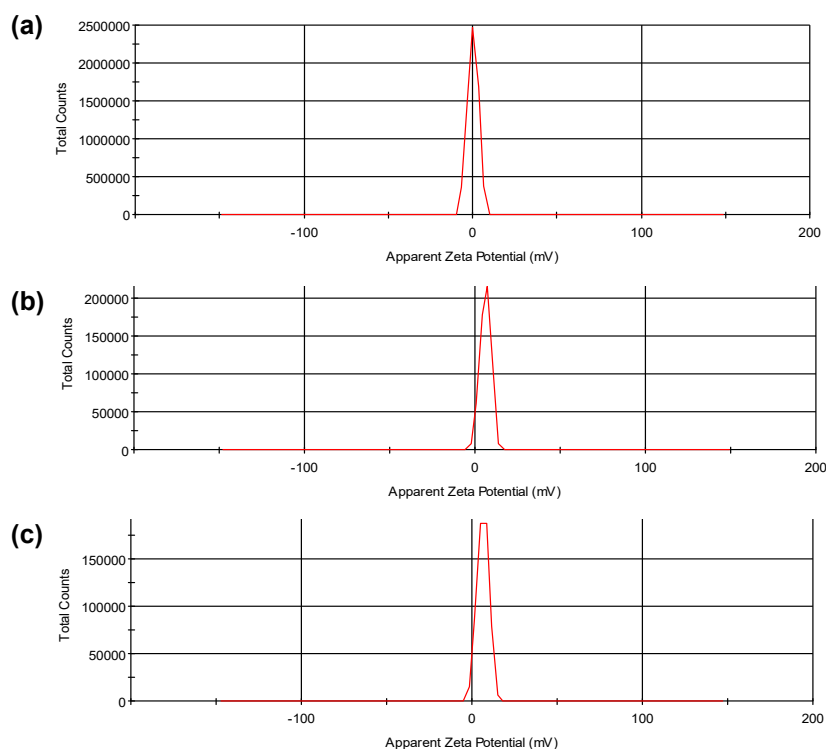

Figure S29.  $\zeta$  potential plots for (a) 1, (b) 1-Pd and (c) 1-Cu.

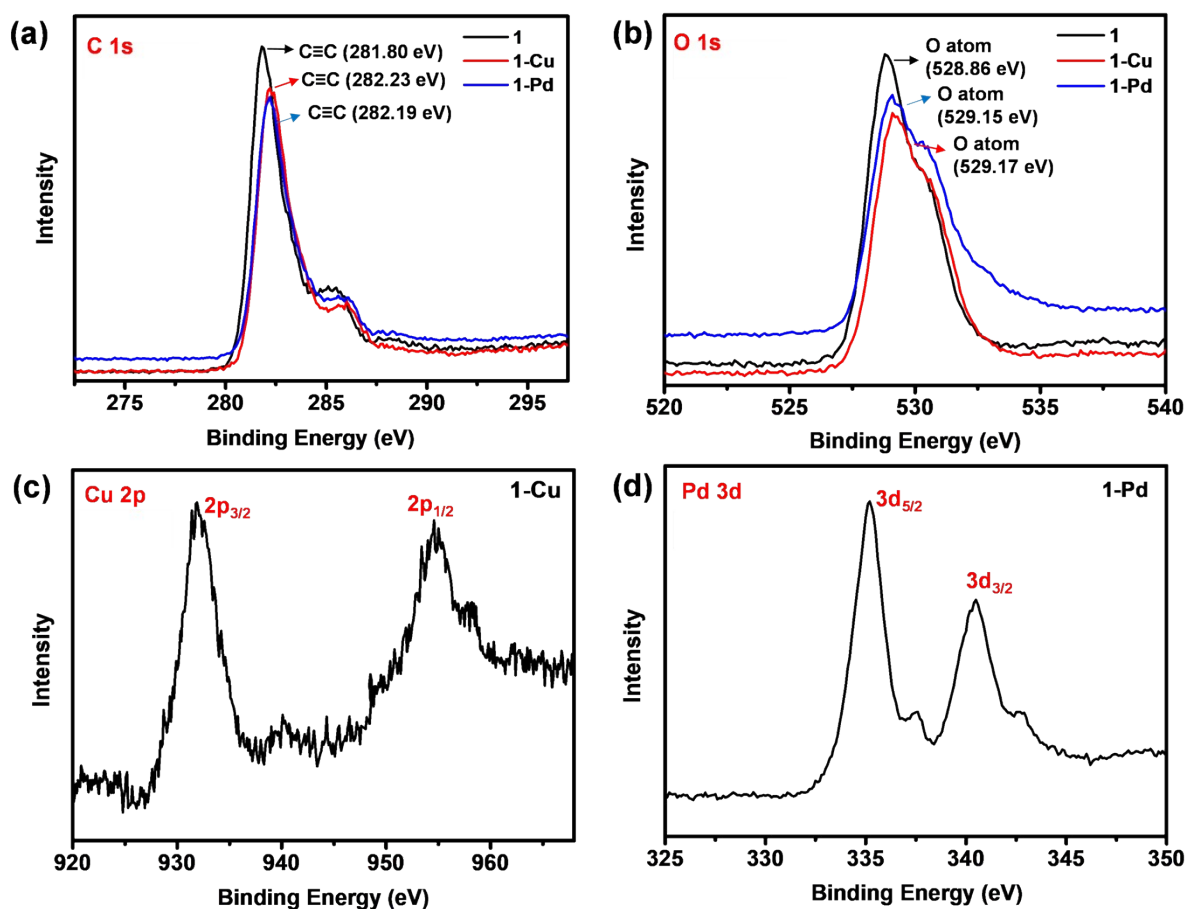

Figure S30. XPS spectra of (a) 1, 1-Cu and 1-Pd showing C1s region. (b) 1, 1-Cu and 1-Pd showing O1s region. (c) 1-Cu showing Cu2p region. (d) 1-Pd showing Pd3d region.

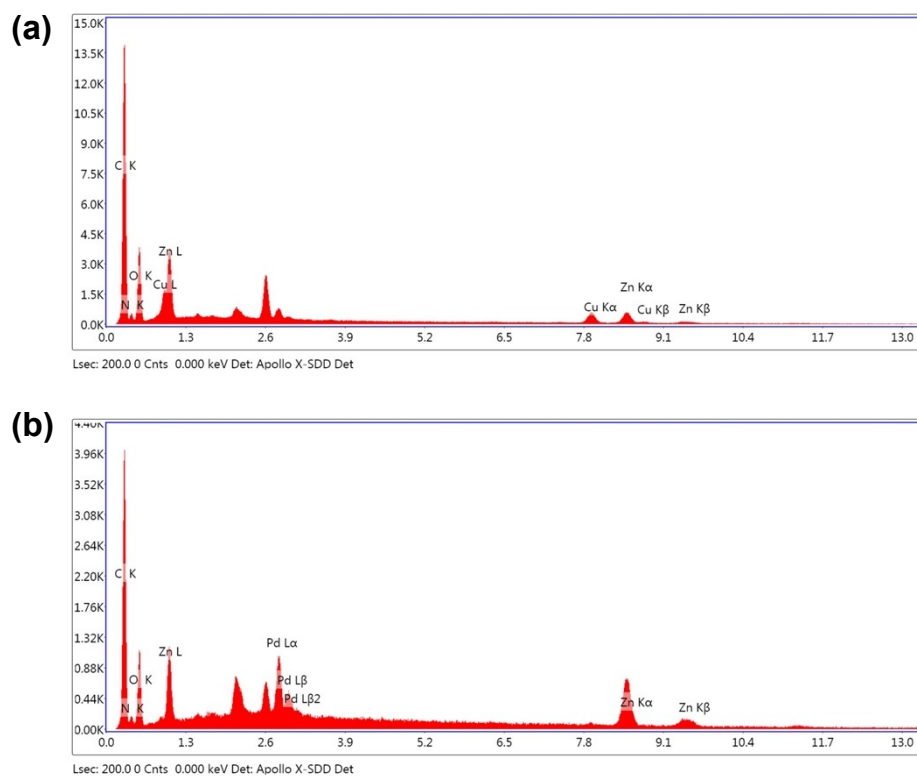

Figure S31. EDX spectra for (a) 1-Cu and (b) 1-Pd.

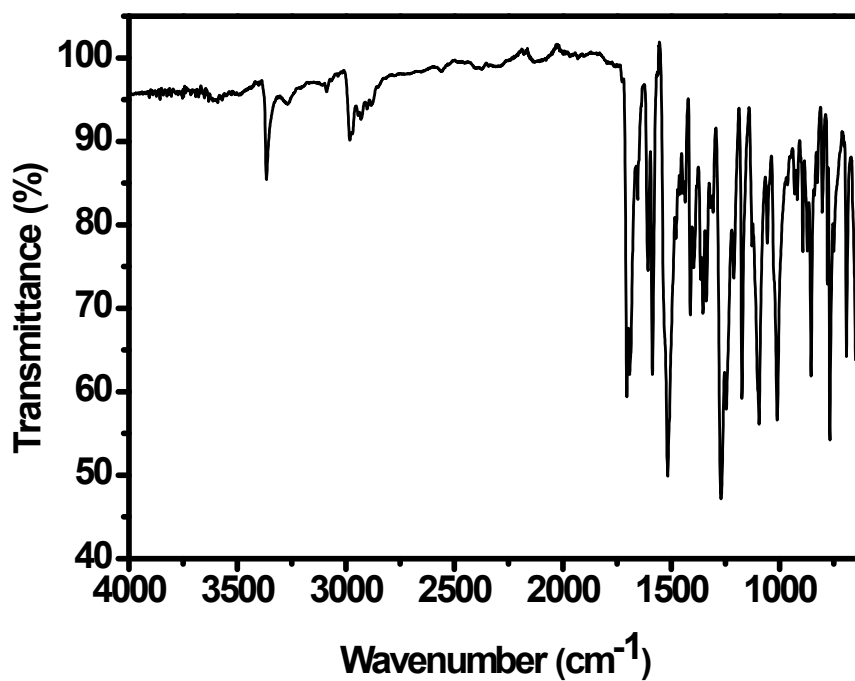

Figure S32. FTIR spectrum of L4.

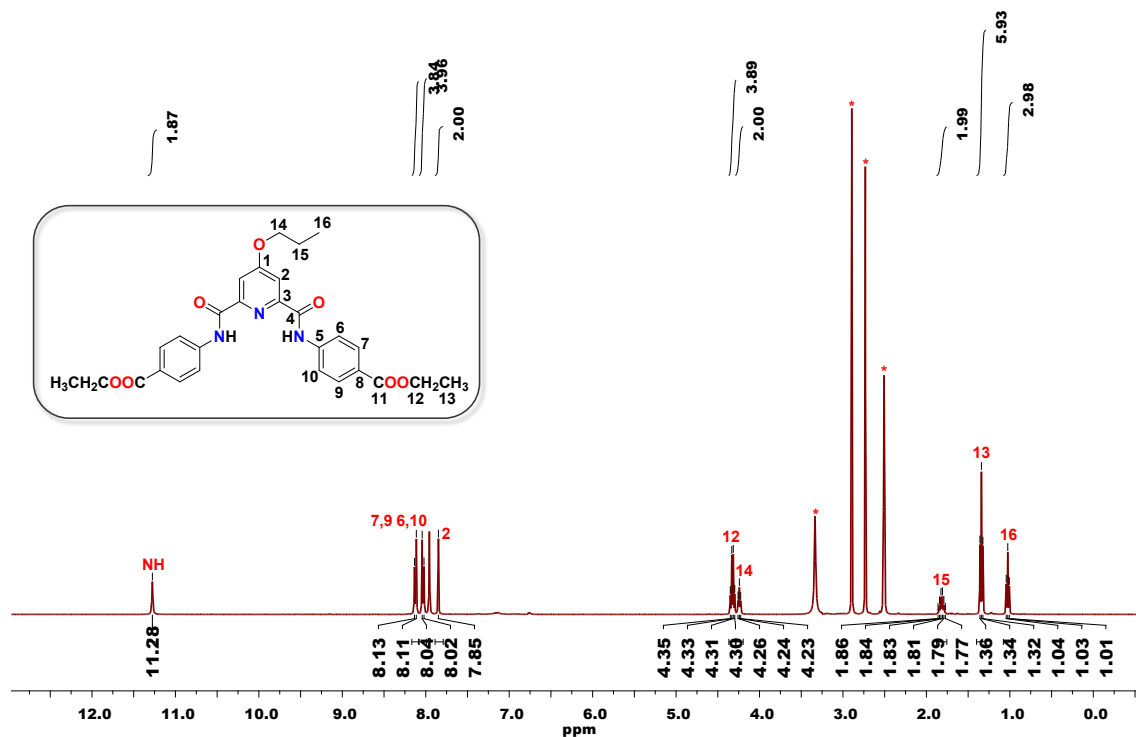

**Figure S33.**  $^1\text{H}$  NMR spectrum of **L4** in  $\text{DMSO-}d_6$  solvent where \* represents the residual solvent and/or adventitious water peaks.

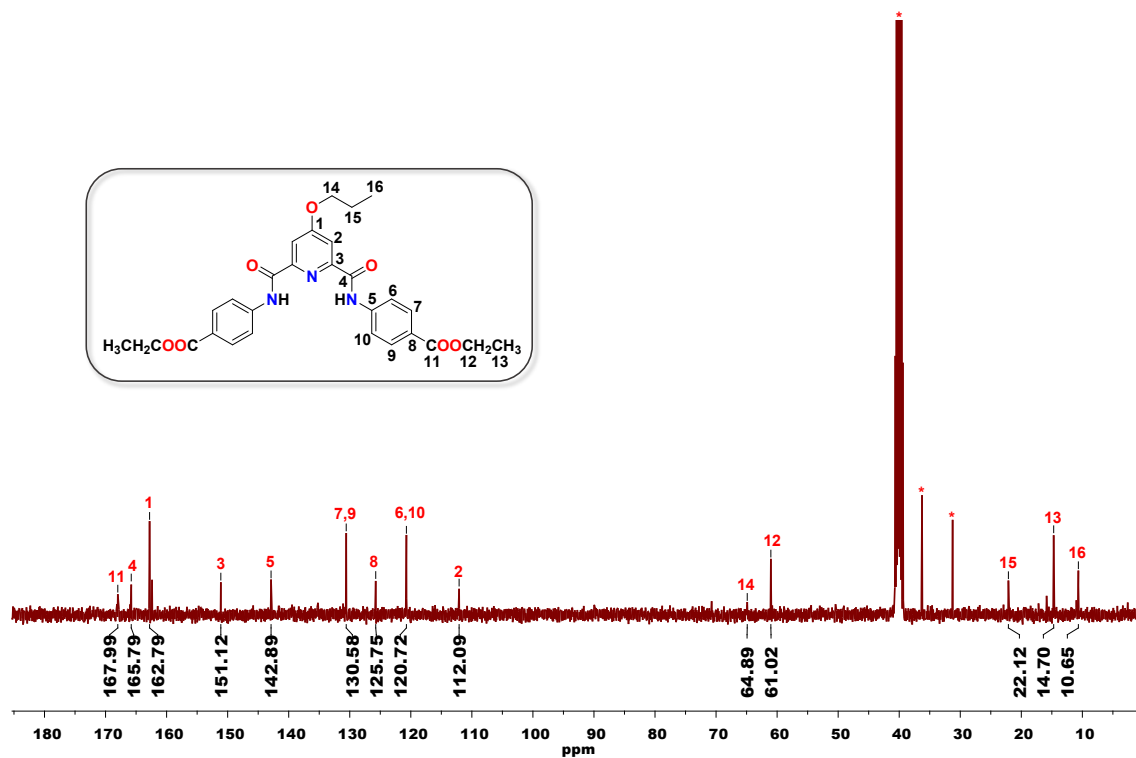

**Figure S34.**  $^{13}\text{C}$  NMR spectrum of **L4** in  $\text{DMSO-}d_6$  solvent where \* represents the residual and/or adventitious solvent peaks.

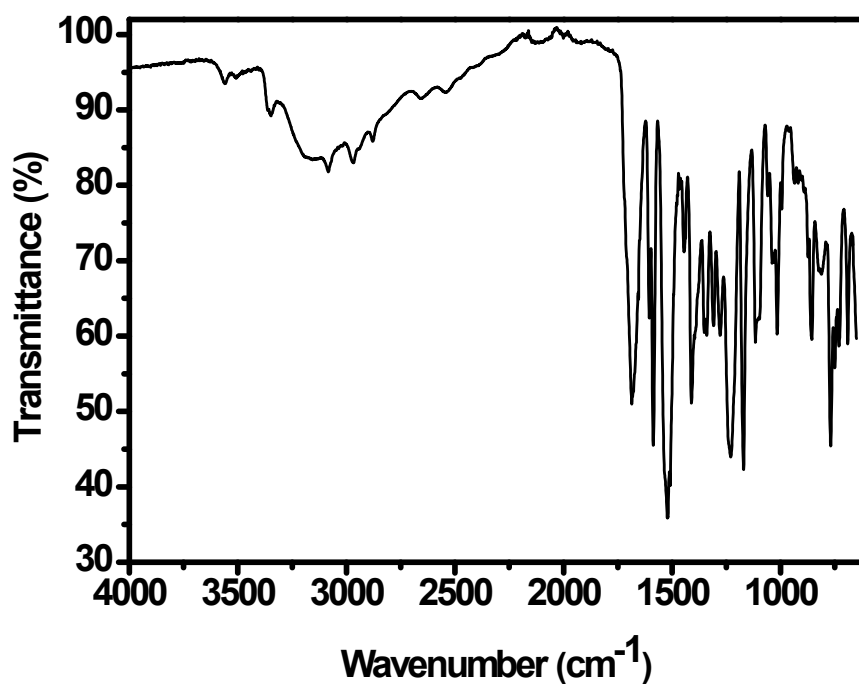

Figure S35. FTIR spectrum of ligand L5.

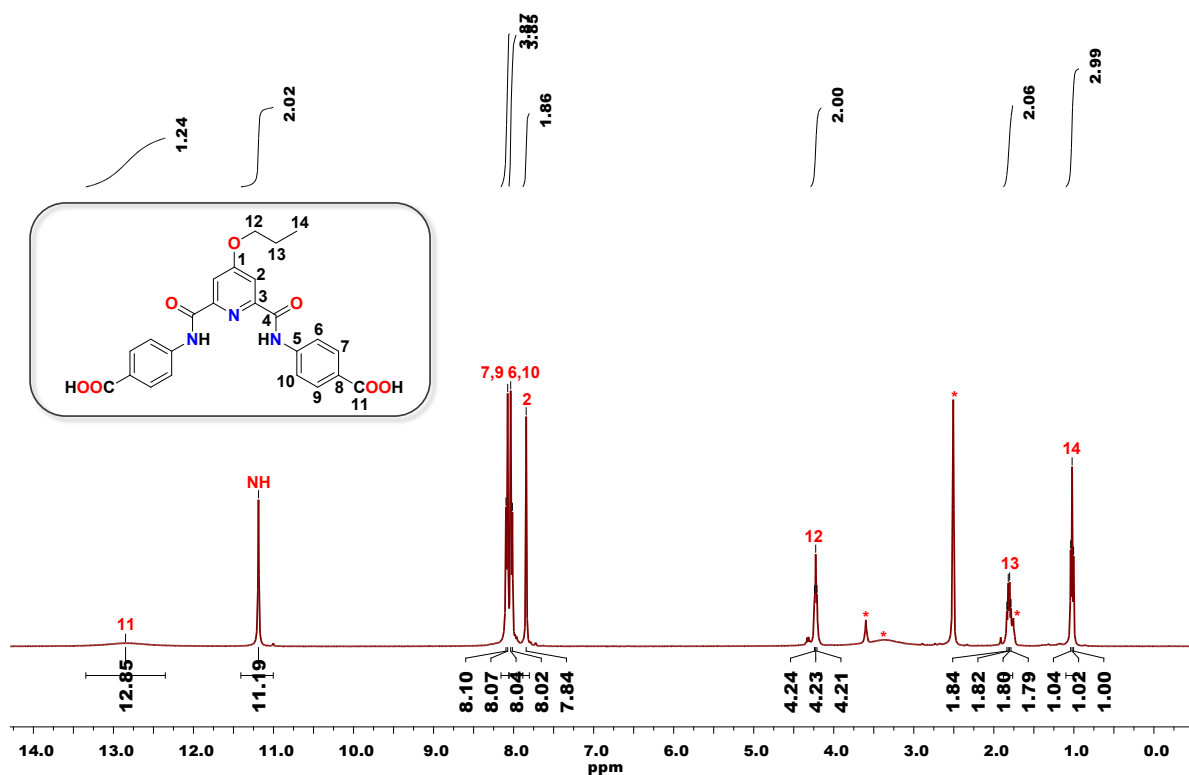

Figure S36.  $^1\text{H}$  NMR spectrum of ligand L5 in  $\text{DMSO-}d_6$  solvent where \* represents the residual solvent and/or adventitious water peaks.



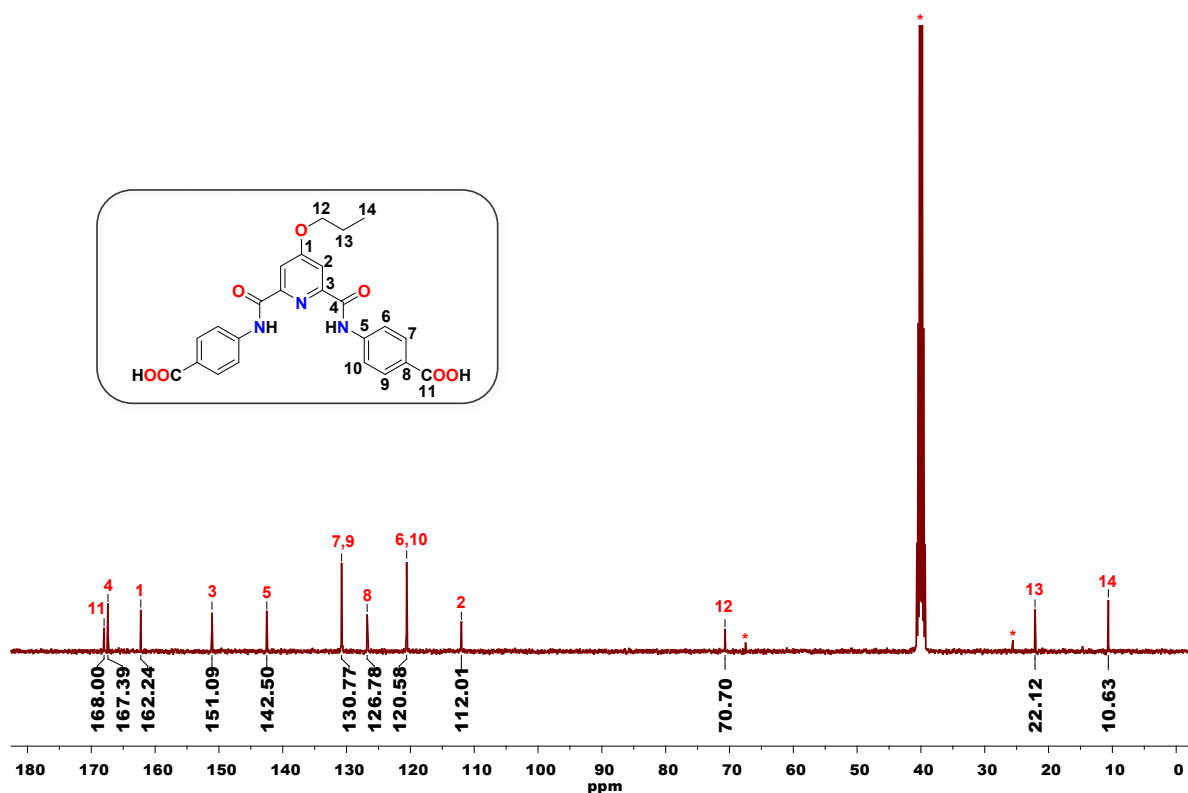

**Figure S37.**  $^{13}\text{C}$  NMR spectrum of ligand L5 in  $\text{DMSO-}d_6$  solvent where \* represents the residual and/or adventitious solvent peaks.

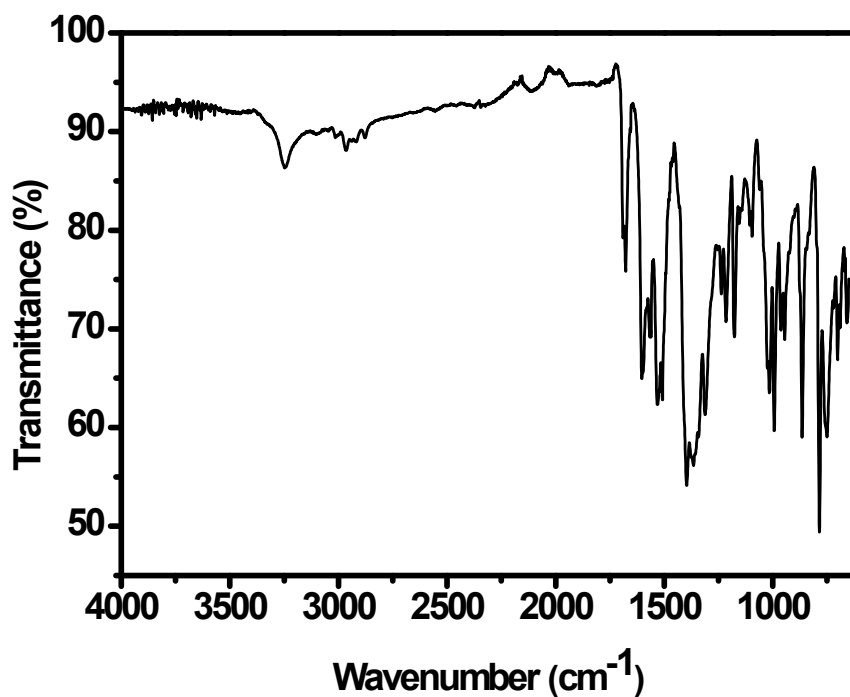

**Figure S38.** FTIR spectrum of MOF 2.

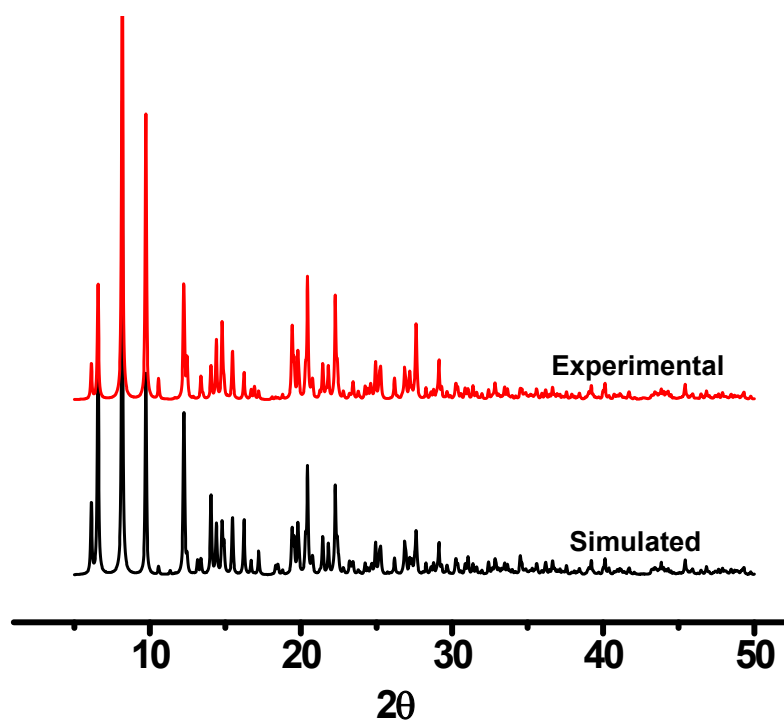

**Figure S39.** X-ray powder diffraction patterns for as-synthesized MOF 2 (red trace) and the one simulated from Mercury 3.0 using the single crystal diffraction data (black trace).

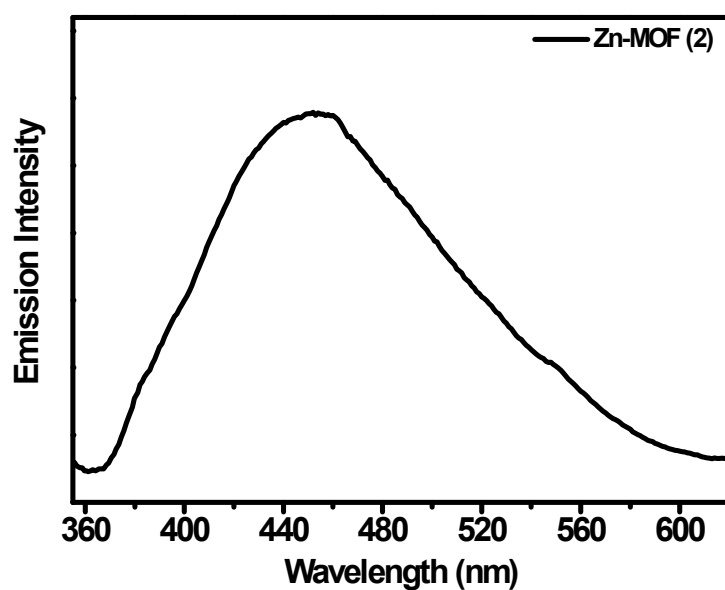

**Figure S40.** Solid-state fluorescence spectrum of MOF 2.

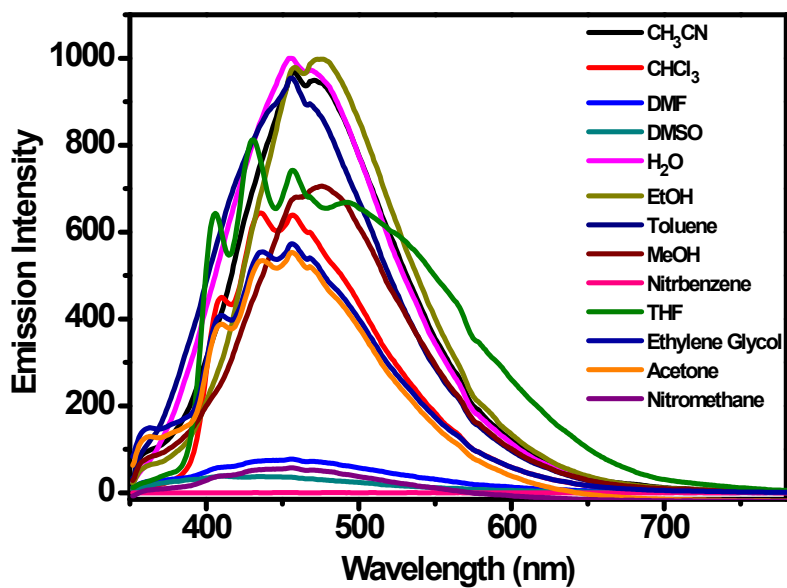

Figure S41. Emission spectra of MOF 2 recorded in different solvents.

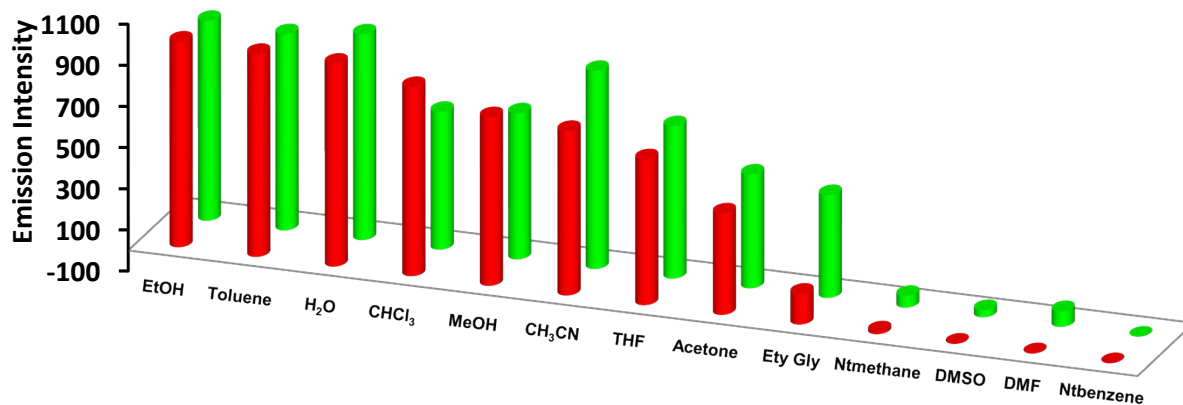

Figure S42. Bar diagram showing relative emission intensity of MOFs 1 and 2 in different solvents.

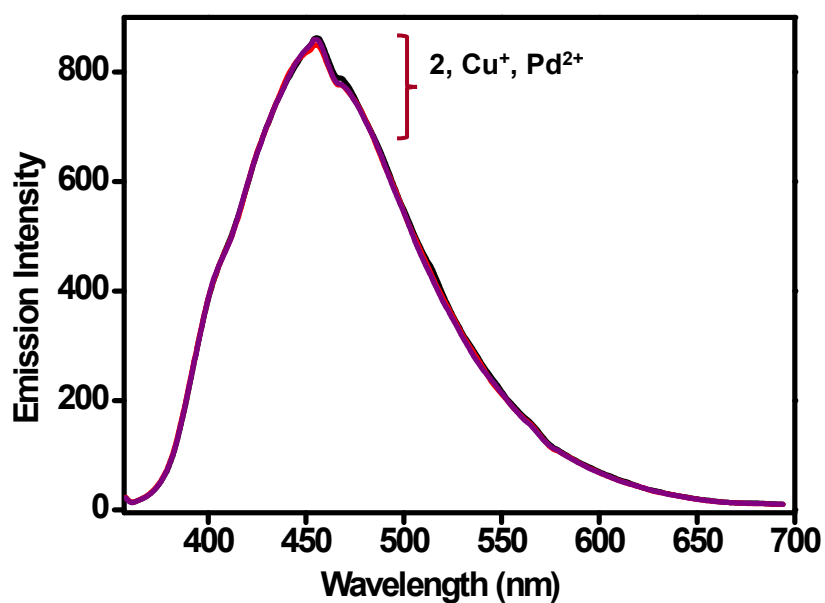

Figure S43. Emission spectra of MOF 2 in the presence of 50 μM of Cu<sup>+</sup> and Pd<sup>2+</sup> ions.

**Table S1.** Crystallographic data collection and structure refinement parameters for MOF 1.

|                                                              | <b>1</b>                                                                     |
|--------------------------------------------------------------|------------------------------------------------------------------------------|
| Empirical formula                                            | C <sub>26</sub> H <sub>23</sub> N <sub>3</sub> O <sub>9</sub> SZn            |
| Formula weight                                               | 618.90                                                                       |
| Temperature/K                                                | 273.15                                                                       |
| Crystal system                                               | monoclinic                                                                   |
| Space group                                                  | C2/c                                                                         |
| <i>a</i> /Å                                                  | 34.862(4)                                                                    |
| <i>b</i> /Å                                                  | 9.8735(11)                                                                   |
| <i>c</i> /Å                                                  | 25.914(5)                                                                    |
| <i>α</i> /°                                                  | 90                                                                           |
| <i>β</i> /°                                                  | 130.261(2)                                                                   |
| <i>γ</i> /°                                                  | 90                                                                           |
| Volume/Å <sup>3</sup>                                        | 6806.6(16)                                                                   |
| <i>Z</i>                                                     | 8                                                                            |
| $\rho_{\text{calc}}/\text{cm}^3$                             | 1.208                                                                        |
| $\mu/\text{mm}^{-1}$                                         | 0.829                                                                        |
| <i>F</i> (000)                                               | 2544.0                                                                       |
| Crystal size/mm <sup>3</sup>                                 | 0.21 × 0.15 × 0.11                                                           |
| Radiation                                                    | MoK $\alpha$ ( $\lambda = 0.71073$ )                                         |
| 2 $\Theta$ range for data collection/°                       | 4.42 to 56.64                                                                |
| Index ranges                                                 | -46 ≤ <i>h</i> ≤ 46, -13 ≤ <i>k</i> ≤ 13, -34 ≤ <i>l</i> ≤ 34                |
| Reflections collected                                        | 72085                                                                        |
| Independent reflections                                      | 8471 [ <i>R</i> <sub>int</sub> = 0.0833, <i>R</i> <sub>sigma</sub> = 0.0440] |
| Data/restraints/parameters                                   | 8471/0/367                                                                   |
| Goodness-of-fit on <i>F</i> <sup>2</sup>                     | 1.055                                                                        |
| Final <i>R</i> indexes [ <i>I</i> ≥ 2 $\sigma$ ( <i>I</i> )] | <i>R</i> <sub>1</sub> = 0.0429, <i>wR</i> <sub>2</sub> = 0.1183              |
| Final <i>R</i> indexes [all data]                            | <i>R</i> <sub>1</sub> = 0.0617, <i>wR</i> <sub>2</sub> = 0.1311              |
| Largest diff. peak/hole / e Å <sup>-3</sup>                  | 0.62/-0.59                                                                   |
| CCDC No.                                                     | 2282501                                                                      |

**Table S2.** Selected bond distances (Å) for MOF 1.

| <b>Bond</b>              | <b>1</b>   |
|--------------------------|------------|
| Zn(1)-O(4) <sup>#2</sup> | 2.0432(18) |
| Zn(1)-O(5) <sup>#3</sup> | 2.0408(18) |
| Zn(1)-O(7) <sup>#1</sup> | 2.0354(19) |
| Zn(1)-O(6)               | 2.0296(18) |

Symmetry transformations used to generate equivalent atoms: #1 2-X, -Y, 2-Z; #2 +X, 1-Y, 1/2+Z; #3 2-X, -1+Y, 3/2-Z

**Table S3.** Selected bond angles (°) for MOF **1**.

| Bond                                          | 1          |
|-----------------------------------------------|------------|
| O(4) <sup>#1</sup> -Zn(1)-Zn(1) <sup>#2</sup> | 78.31(6)   |
| O(5) <sup>#3</sup> -Zn(1)-Zn(1) <sup>#2</sup> | 81.69(6)   |
| O(5) <sup>#3</sup> -Zn(1)-O(4) <sup>#1</sup>  | 159.95(9)  |
| O(7) <sup>#2</sup> -Zn(1)-Zn(1) <sup>#2</sup> | 80.93a(6)  |
| O(7) <sup>#2</sup> -Zn(1)-O(4) <sup>#1</sup>  | 90.00(8)   |
| O(7) <sup>#2</sup> -Zn(1)-O(5) <sup>#3</sup>  | 88.28(8)   |
| O(6)-Zn(1)-Zn(1) <sup>#2</sup>                | 78.76(6)   |
| O(6)-Zn(1)-O(4) <sup>#1</sup>                 | 85.24(8)   |
| O(6)-Zn(1)-O(5) <sup>#3</sup>                 | 89.47(8)   |
| O(6)-Zn(1)-O(7) <sup>#2</sup>                 | 159.68(9)  |
| C(16)-O(4)-Zn(1) <sup>#4</sup>                | 129.20(18) |
| C(16)-O(5)-Zn(1) <sup>#5</sup>                | 124.54(17) |
| C(24)-O(7)-Zn(1) <sup>#2</sup>                | 125.70(18) |
| C(24)-O(6)-Zn(1)                              | 129.02(19) |

Symmetry transformations used to generate equivalent atoms: <sup>#1</sup>+X,1-Y,1/2+Z; <sup>#2</sup>2-X,-Y,2-Z; <sup>#3</sup>2-X,-1+Y,3/2-Z; <sup>#4</sup>+X,1-Y,-1/2+Z; <sup>#5</sup>2-X,1+Y,3/2-Z

**Table S4.** Fluorescence lifetime parameters for **1**, **1** + Pd<sup>2+</sup> and **1** + Cu<sup>+</sup>.

|                             | T1<br>(ns) | T2<br>(ns) | T3<br>(ns) | B1      | B2      | B3      | Average<br>Lifetime (ns) |
|-----------------------------|------------|------------|------------|---------|---------|---------|--------------------------|
| <b>1</b>                    | 3.5023     | 1.9061     | 12.5051    | 0.02786 | 0.01351 | 0.0129  | 8.43                     |
| <b>1</b> + Cu <sup>+</sup>  | 3.1529     | 0.5258     | 14.5631    | 0.01801 | 0.12904 | 0.00274 | 4.84                     |
| <b>1</b> + Pd <sup>2+</sup> | 3.1109     | 0.6843     | 16.1626    | 0.01757 | 0.11595 | 0.00253 | 5.06                     |

**Table S5.** Crystallographic data collection and structure refinement parameters for MOF **2**.

| <b>2</b>                         |                                                                                 |
|----------------------------------|---------------------------------------------------------------------------------|
| Empirical formula                | C <sub>28</sub> H <sub>29</sub> N <sub>3</sub> O <sub>9</sub> S <sub>2</sub> Zn |
| Formula weight                   | 681.03                                                                          |
| Temperature/K                    | 100.15                                                                          |
| Crystal system                   | monoclinic                                                                      |
| Space group                      | <i>P2<sub>1</sub>/n</i>                                                         |
| <i>a</i> /Å                      | 18.1952(6)                                                                      |
| <i>b</i> /Å                      | 8.3525(2)                                                                       |
| <i>c</i> /Å                      | 21.6671(6)                                                                      |
| $\alpha$ /°                      | 90                                                                              |
| $\beta$ /°                       | 94.039(3)                                                                       |
| $\gamma$ /°                      | 90                                                                              |
| Volume/Å <sup>3</sup>            | 3284.69(16)                                                                     |
| <i>Z</i>                         | 4                                                                               |
| $\rho_{\text{calc}}/\text{cm}^3$ | 1.377                                                                           |
| $\mu/\text{mm}^{-1}$             | 0.927                                                                           |
| <i>F</i> (000)                   | 1408.0                                                                          |
| Crystal size/mm <sup>3</sup>     | 0.20 × 0.16 × 0.12                                                              |

|                                                  |                                                               |
|--------------------------------------------------|---------------------------------------------------------------|
| Radiation                                        | MoK $\alpha$ ( $\lambda = 0.71073$ )                          |
| 2 $\theta$ range for data collection/ $^{\circ}$ | 6.23 to 62.04                                                 |
| Index ranges                                     | $-25 \leq h \leq 19, -9 \leq k \leq 11, -31 \leq l \leq 29$   |
| Reflections collected                            | 38109                                                         |
| Independent reflections                          | 8794 [ $R_{\text{int}} = 0.0468, R_{\text{sigma}} = 0.0427$ ] |
| Data/restraints/parameters                       | 8794/0/398                                                    |
| Goodness-of-fit on $F^2$                         | 1.038                                                         |
| Final $R$ indexes [ $I \geq 2\sigma(I)$ ]        | $R_1 = 0.0727, wR_2 = 0.2022$                                 |
| Final $R$ indexes [all data]                     | $R_1 = 0.1002, wR_2 = 0.2230$                                 |
| Largest diff. peak/hole / e $\text{\AA}^{-3}$    | 0.36/-1.36                                                    |
| CCDC No.                                         | 2282500                                                       |

**Table S6.** Selected bond distances ( $\text{\AA}$ ) for MOF **2**.

| Bond                     | 2        |
|--------------------------|----------|
| Zn(1)-O(6)               | 1.946(3) |
| Zn(1)-O(7) <sup>#1</sup> | 1.958(3) |
| Zn(1)-O(8)               | 1.972(3) |
| Zn(1)-O(5) <sup>#2</sup> | 1.939(3) |

Symmetry transformations used to generate equivalent atoms: <sup>#1</sup>-X,1-Y,1-Z; <sup>#2</sup>-1/2+X,-Y,-1/2+Z

**Table S7.** Selected bond angles ( $^{\circ}$ ) for MOF **2**.

| Bond                                         | 2          |
|----------------------------------------------|------------|
| O(6)-Zn(1)-O(7) <sup>#1</sup>                | 116.74(12) |
| O(6)-Zn(1)-O(8)                              | 103.35(12) |
| O(7) <sup>#1</sup> -Zn(1)-O(8)               | 96.10(12)  |
| O(5) <sup>#2</sup> -Zn(1)-O(6)               | 115.79(13) |
| O(5) <sup>#2</sup> -Zn(1)-O(7) <sup>#1</sup> | 104.54(13) |
| O(5) <sup>#2</sup> -Zn(1)-O(8)               | 119.24(13) |
| C(24)-O(6)-Zn(1)                             | 135.5(3)   |
| C(24)-O(7)-Zn(1) <sup>#1</sup>               | 121.5(3)   |
| S(1)-O(8)-Zn(1)                              | 121.92(16) |
| C(16)-O(5)-Zn(1) <sup>#3</sup>               | 108.8(3)   |

Symmetry transformations used to generate equivalent atoms: <sup>#1</sup>-X,1-Y,1-Z; <sup>#2</sup>-1/2+X,-Y,-1/2+Z; <sup>#3</sup>1/2+X,-Y,1/2+Z
